# Supplementary material for: LncGSAR Controls Ovarian Granulosa Cell Steroidogenesis via Sponging MiR-125b to Activate SCAP/SREBP Pathway
Source: MDPI journal article supplement (doi:10.3390/ijms232012132), 2022-10-12
Supplement: s1 [file s1]

# **LncGSAR controls ovarian granulosa cell steroidogenesis via sponging MiR-125b to activate SCAP/SREBP pathway**

**Yong Wang <sup>1</sup>, Yunxia Guo <sup>2</sup>, Chunhui Duan <sup>1</sup>, Junjie Li <sup>1</sup>, Shoukun Ji <sup>1</sup>, Huihui Yan <sup>1</sup>,**

**Yueqin Liu <sup>1</sup>, Yingjie Zhang <sup>1,\*</sup>**

<sup>1</sup> Laboratory of Small Ruminant Genetics, Breeding and Reproduction, College of Animal Science and Technology, Hebei Agricultural University, Baoding 071000, PR China

<sup>2</sup> College of Life Science, Hebei Agricultural University, Baoding 071000, PR China

\* Correspondence author at: Hebei Agricultural University, Baoding 071000, Hebei, PR China. Tel.: +86-31-2752-8366; Fax.: +86-31-2752-8886; E-mail address: zhangyingjie66@126.com (Y. Zhang).

**Figure S1.** Gene Ontology (GO) term enrichment analysis of differentially expressed lncRNA target genes in different glucose treatment groups.

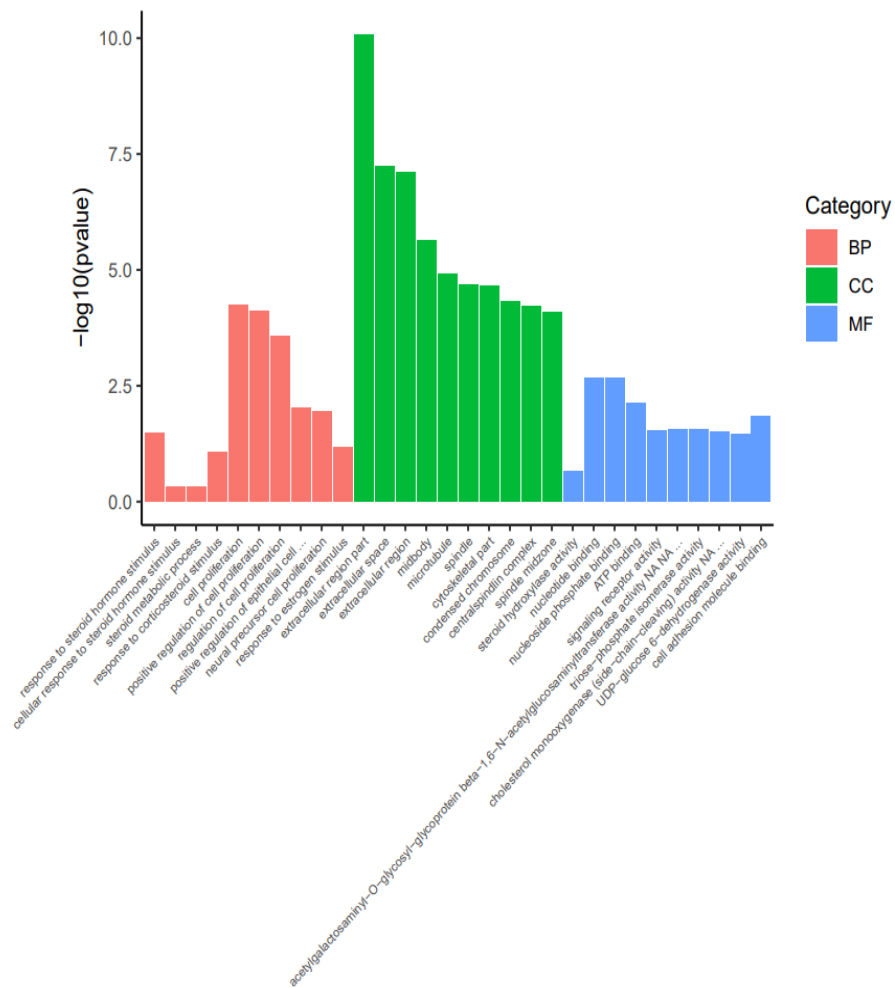

**Figure S2.** Kyoto Encyclopedia of Genes and Genomes (KEGG) enrichment analysis of differentially expressed lncRNA target genes in different glucose treatment groups.

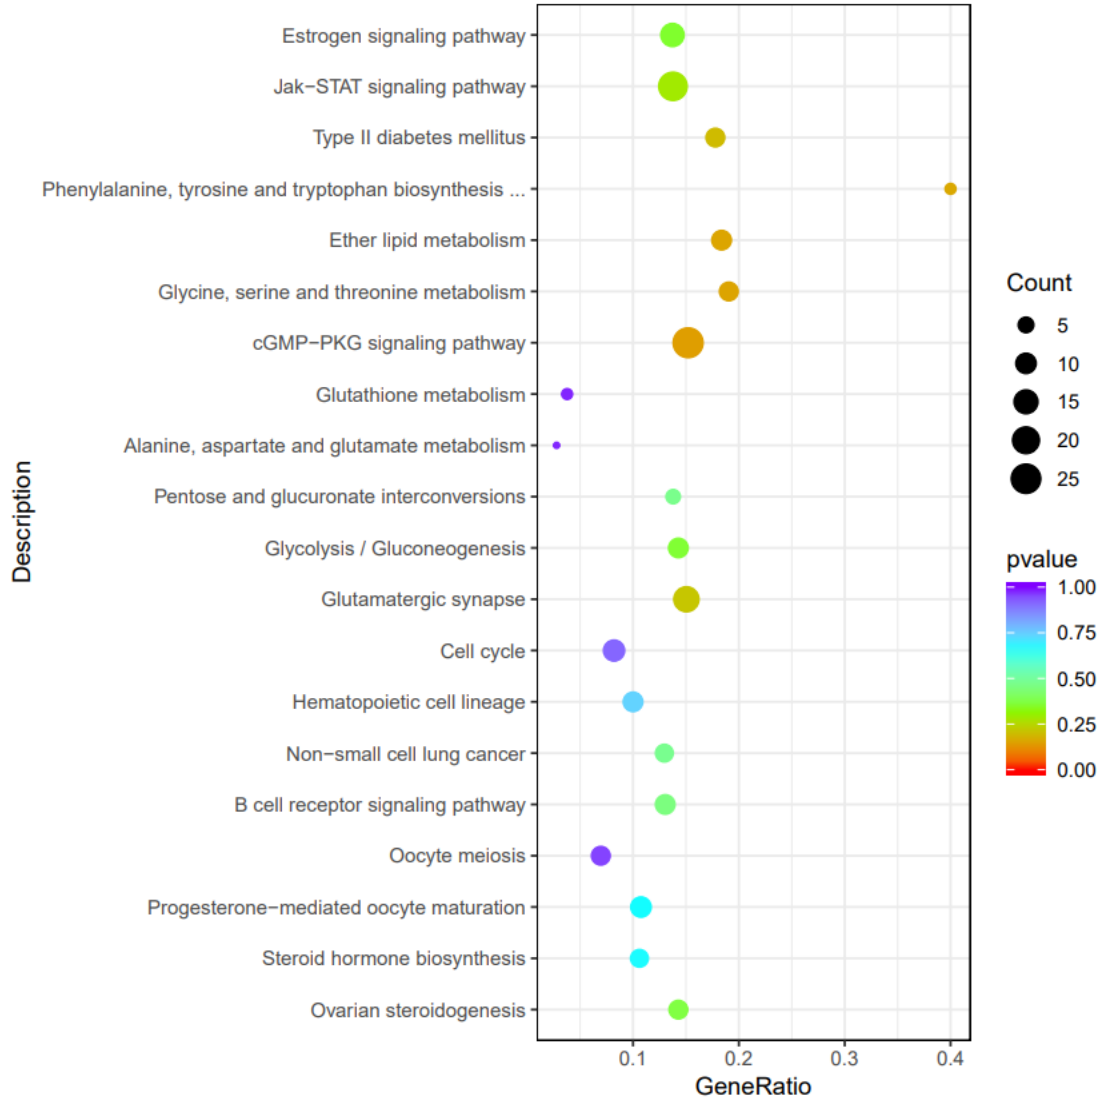

**Figure S3.** RNA sequence of lncGSAR.

GGTACGGAGCGGCCCGGTGCCGGGGCGGGGACGACCTGGGACGGCGGCCGCGGGCTCTGCCCAGAGTGCGG  
GTGGCTGGCCGGCGGGGGCGCGGGTCCGGGGGCGCCGGGCTGCGCTGGGGAAGGGGCACCGAGGGTTTGGGA  
ATCGTCCTGGCATGGAGACGCAGCCCCAGAGTGCGGCCACGGGATGAGGGTGTATCATCGGAGAGTGTGTTTTG  
GTGGGTCCACGCGCGTCTGCGTGCCTGAAAATTGCGTAACTTTGAGGACTTTCCCGAGACCTCTGTAAGTATAAT  
GGTCAGCTTTGTTTGCCCCGATTTTAAAAGCGGAATCGAGAGCTGACTCCTGGGTGACCTCAGATGATTGGGAC  
CCGGAGGGTCAGCACTTAGTGCTGGGTCCGGGGCTGGAAGTTGTGGGGTGTGTGTTGTGTGGTTAGGGAAGA  
AACTCGGGGAAAGTTCTCATGAAAAGACACCTTCCGTTCCCTGCCCCCCCCAACCCCCACAGTTTCTATGCGAAA  
AGTTCTCGGTGAAATATCTTTCCAGCTAAGGCGTTTTGGATTAATAGATAACTCATCAGCCGATTCTTCTCTGAT  
GAGTCAAAGACCCGAACCTGGCTGATTAGGTTTTGTAATTTAGGGGCGTTGCGGTTGTGGGGCGCAGCATGC  
TGGAGTTTCAGACTTTGCAACTCGCGAAGTGTGATCCAGACTGTTTTAATAGGACTTTGACGTCTGAGCGTAAAT  
TTTATGTGGTGCCTCCCTAACACGGTAAAAATGTTGCGGCTGCAGAGCGTTCCTTTGGTAGAAACAAAACCTCAG  
TACATGTCGGGGAACCTCCTGAACAATCCTTTCAGAAATTTGTAGTTGGGATATTTGCGTTATCTTGTTAAATGGGG  
CTCTGTACTTGTAGGTGCATTATCTAGAACCCAGTAAACACTGTTTTCCGCTACCTTTTAAAAGCCCAGGAAAT  
TGACTTCTGAAACATTCCAAAAGGAACCTTAAGAGTATGTGTAGATGCAAGAAAGTATGCAGTCTAGATAAAAGCA  
TTCTTACAGAAAGGTGAACTGATTTCTAAGCGGTTAGGGTGTGAGATGATTATGGAAATACTATGTTGTGTGTAA  
ACTAAAATTGTGATTGTGAAGCCCAAGGTTGCTGAGGACTTAATACACTTAAGCCCTCAGCACTTGTAATAATGGG  
AACTATTTAAATGGAGAAGACAGGAGAGCTCCAAGACCAAGCCAAATATTATGCAAAATAACACAAGATTTTACT  
CTTAACACCGTTGTTGCTGAGTGCAACCCAGGTGAAATGCTGTTGAGCCTGACGTTGCCGTCTCACCTGAGCAAA  
TCGCCTTTATTATTATAAACTGTTCTGAAAAGCATTATTTTTACATGCTGGTTTTTTAAATTGCAAGTGATGGAATAG  
TACTGACATTTCTTCTTTTCAGAAAGATGGAGACTTGAATTGCAAGTCTGCTTTTTTTCTGAACCTCACTGGCT  
ACTTTCCTATTTTATTTTCCCTACCACTGAAATAAAATTTAAAAGGTAGTTTCTTTTTTTTTAAATGCTGGAGTATTTT  
ATTTTTTATAATTAATAAAAAAGGTAGCTTTATTTAAGGAGTTGCAATGGCTTCAGAAACCTTTCTGTTTCATTAGA  
TTGGCGATCTGTTGACTTCTAAGGGTAAGACTGTATCATACATATGAAACCATCTTCTCTCTTACCAGAAAGAG  
AAACTTGTAAGGTTTATTAGGGTAAACCAAAGACTATTTTCTTTTTTTTTTTTTTTTTTTGGCACACCATAAACTATT  
TGACAGAATTAAGCATAGAAAACCTCAGGTTTTTCTGTTTGACCCAGCTCAGCTTAAGTGCCTGCAGCACTGGCCT  
GTTTGCCCAAACCTGGGTGTCTTTATATGTGCGAGGTTGGGTACCGGTAAAATCACAGGTGATCCCAATACAAT  
GGGTGTCTCTTAACCTGTCTATTGCCTTGTTAAGTCTTCTTTATCAGGTGGAAATGGCCCGTGGTTCTAGAAAGT  
ATCTGTCTTTATAGCTAGATACTTGTTATTTTAAAGATAAGGGGACAGATTAATAAAAAATAGAACCCAAGCTGTACA  
AAAGATGGAATAGACAAAACAGATACACCGTGAAGGGAGAGGTTTTATGATGTTAAAAATTTGGTAAAAGTTGG  
CCTGAATGATCTCGATAATTTGCCCTAATCCCTGTTTGGGGTTTATGTTTTGTTGTGAAAACTCCTCCTTTTTT  
CCCCAACCTGAAAGCCACAAGTAAAACACATGTGTTTGAGTCCCATTAATGTGCTCAGCAATATACAAAACCAC  
CCAAATGGTCCTTTCCCTTGCCACCCAGGGATCAGCAGTTTGTCTCAAACACATTGGAAAGCCGCGGTGGAG  
GATTCCAGTAAACAGAACACACATATAAATGTATATACAAAAATGATGAGTGTGTTGTAGCTTCTGGTAGCCATT  
GAGCTGATGAGTCAGTTTCTGATCATCTTTGAGGGAAAATAGTTTCTTAGATCATCAGGGTTATTTAGACTTTG  
ACAAAATCCAGGTTTTATTCTATCCCTCCCCCTCATTTAAGTGTGTTCTTTTATCTTCTGGTACATATCAGCGGC  
CCACCTCCTGGTCTGAGAGCTTCTGAAGCTCACTCTGAAACAATGATGCTGAAACACTTTCTTTAGTTCCATTGCT  
ATAGTAGGAACAGTCTTGAGACCTAGGAGCATTTCTGCAGCTTTTAAAGTAGGGTTGGAAGTTTTGAGACTGCTT  
TGGGTAATATTTAAACTTTGAGGAAAAATAATTTAAGACTTGGCTAGCCAATAGTGTGAGAGAGAGGATACAT  
CTGGCTTTCTGGCTTCTAGTGTGCTGACATGCGTATTCCTGTGCAACTTGTCCGGGTAAAGAAGACCGGTTGTC  
AAAATCTTAATGGCGTCTGAGATTTGCAAGGCTTCTGTATACATTTGTGTAGGGGCAGACAGGACTGGGTGACTG  
AATAACAGGGCAGTAGAGCTTTTCTTACATAGCTTTACAGTTAATAGCTTTACAGTTAATAAAAAATTCCTGAATT  
TACCTCTACTTTTGGACTAGACATTTCTTCTTCAAATACTTCACACTTGACAAATTTCACTACTGTTAATATGTAAG  
AGACATAACTTTTTGGCTTGAAGTTCTGTATATTGCAACAGTCTAGTAGTAGATATCGTTTTTGATCCCTGAATTTT

CAAAATGGAAATCAGATAAATAACTTGGTCTTATTTTCTTTTATGGTATGCCGTTGGACACTTTTCAGGCTGATT  
ACAAGTCATTTCTAAAAGGTGTGTTATTTACGTCTGAAGCACTGGTGTTAGTTTTCTCCTTAAATTGCTGTGAACGTT  
CTTTAAACAAAACCTGGCCTTGTGGAATATTGATCAAAAAGATGTTTGGCAGATGGTGGTCAGAAATCACAAA  
GTCAGGTGTTTCAAGAAGTTAATACAGATCTCTACCTCGAATTCTACCTTTTAAAGTGCTTTGTAATTTTCCCAAAT  
AACTGGGGTCATGAAGAAAATTGTTTCTGATATAATTGGCACAGAGAAATGTGTGGTGGTTTGATGCGGCAACCT  
CAGGTTTTTCATTGAGCATTAAAGATTCATCAGTATTTTGACCTGGGGAAAAATACAGAATGGTTTTGTACAGTTTAA  
CCAAGTTTGGAGTCTGTTACTCCAAATCAAATCAAATACAGTAAATTTATATTTTCAAGTCATAAATAGGATTTGGTG  
ACAGCGTTTTGGATGAAAATGTGATGATTTCATAGTAAATGATGCTGCAAGACCACTGCCAATATGGCATGCCC  
TTAGTTTTCCAGTAGTGGTTTTAAATTTCTGTGATAAACCTGACACTCACATGTAGTCATCTGTTTCTAAGGGCA  
TTTGTGTGTTTAAATGCTCTCATTGGAGATGCTTTCATGTAAATTTTGCAGGTTCATCTTAATTTTCCACTTTGAGGAT  
AGAAGTGTGACTGGTGATGGGGAATAAAATGGGAATCTTGGGCGCTGCGATGAGGGCATGAATTATTGCGGCT  
TTCGGAAGGACTTTGGCGGTCTGTGTCAAATTTTCAAGCCCTTTTATTCCGTGCTTTTATTTTGTAGAAATTTACCCTA  
AGGAAATAAGCATGCACAAAGATTTATTTATAGGATATAGACATAAATAGTCTGTGAATTTTCACTAACAAGGAA  
ATTGCTAAGTAAATGGTTGTGTAATTCCTCAAAGAGAATACTATGTAGCCATTAAGCCACATTTTAAAGAATG  
TACCTATGTGATTTACTTTTTTGGGGGAGGTGGCTTAAACATTTATTCTCTCAGTTTTAGAGGCTAGAAATCTGG  
AATCAGTGTTTACCTCTCTTTGAATGCTGTAGTAGAGAATCCGACTTTCTCTCCAGCCTCTGGATTTTAAATTAAT  
CCCATGACATTACATGAAAAAAGTAAAAATAAAAGTTTGTATTATGTGATGCCAATCTTAAAAATAATTGGATA  
TGAATACAAACAGTGTGGTGGATTACAGGTCTTGTATTACCTTCTGTTGCTTTTCTGATTCTCTAAATTTTCTGT  
AATGAACATATAGGCACAGAAGCAGTTCTAGGTCTTTGCTTAGAAGAAATCATTAAATACCCTTGCAGTATCTATA  
GGTGTACAAAAACCATTGTTGGCCACGTTTCATTTTGTCTCGCAAGCCTTGCCCCAGGAATCAGGCCTCCATATCTC  
AAAGCATGTTTACCTCGCTCATTTCTTGTCTGTCTGTTCTAGTGATCTTAACCTGCTGTCTTGTCTGATGTTT  
TTTCTCAATCCATCCACACGTACACTGCTGGATGCTCTGGTGCCCAACTCCGTCAGCACTTGGTGAAGTTTAAATA  
TGACCTTCAAGATTGCTTTTGGTGCTCTGTAATATTCTGCACACCATTTATTTCAACCAGTTTTCCCTCTTGGTCAA  
GCTTGAGTGCTTTTCTAGGCAAAAGCCAAGGTTTCAAGCTGCAATTTTGCAAGATCCCATCACCTGAATGTCTTATCC  
CAAAGAGATGACTTTTCTCAGAATTCCAGAAGTTATATTCTTCTAGTTAACTCGTGGATCATTATCTTTAAAAAAT  
AAACAAAAAACCCTGCCATCTTACCAGAGTATTTCTAATCCCCAGCACCTCCCCAGGTAAGTACCACCCAT  
ACACACTTAAACCTGTGTGCACATATAATTCTTGATAAAACACTTATGAACATAGGAAATATCCTTACTGGTAGGA  
GTGGTAGTGATGACCTTGAATAGGTAAACTCTCAAAAAGCAGCCACTTAATAACTTCATGTGCAGTTTATAGTCT  
GTGAAGGATGGACCCCCACCACCCTCCAAAGTGACCTCCCCAACTTGTACCTGCAGCCTCCCTTTGTGCCAG  
AGGCCAGTGTGCTTGGTCCATCTAACAATGTGGGCCGCTCATCTCCAGGTGCAGCTGGGTCTTCACTGTTAGAA  
TGTGGTGTCTGCTGTGGGATCCGTTCTGAGCTTTTGGACCAGGGCTTCTGGGAGCTCCAGTTCGATGTGAGAGAA  
GCATTCCCAAATGAGCCTGCTCTGTGTGACCTGTGTGACTGCCACTTTGAAATGTTTGTGTTCTTTTTCATTTGGCA  
CCTTAGTGCTGCCCCGGGGTAGGGGAAAGGAATGCAAATGGTCCTCTTGAACAGTGCTTGCTTTGGTGAAAG  
GAAAAATTTAGGAAGGAATGAAGAGAATGAGCCTTAGTAATAGCTGGGGCAGAAGTGGCAGCCTGGCTCTGTG  
GGGCTGAGGCCAGCTGGGACCAGGCCTTTAAAGTTGATTGGAGGGTGTATCGGGAATGACCTTGTCTGCCCT  
GTGGGGATAACTTGCACTGACTCACGTGGGTCCCTTTAAGTGTGGGGAGGATATTGCAAACCACTTCAGTGTGTT  
GTGTGTGTTGGGGGCAAGTGGGGAGTGCTTGACTGCAGAGCTGGTCAGAGCAGAGTTGCCTAGTTTGTGGCCTG  
GTCATCTTTGCTGGGCGTCCACGTGGCTCAGTGGTAAAGAATCTGCCTGCCAATGCAGGAGACTCTGGTTTCAT  
CCCTGGATCACGAAGATTCCCTGGAGAAGGAAATGGCAACTCCCTCCAGTATTCTTGTCTGGGAAGTCCCATGA  
GCCTGGCAGGCTACAGTCCATGGGGACGCAGAGTCAGACACGACTCAGCGACTGAGCACGCATACACATCTTT  
GCTGAGTGCAGAAAAATGAAAAATTCTGAACACTTGTATCTGCGGAAATTTTTCAGAAATCTTTTATGCCATTACCC  
AGGTAAGAATTATTAACCTTTGAGTATTTACTTTGTGCCGAGTACTGGCCAAGCACTTTTATATGTATCTTGTGACT  
CATCCCCACAATGAGCTAATGTAGCGATCAGGGCAGTGATGAAACTCTTCTGTGGGGAGGTGACTGAGATCCT  
GAGTGCCTTGGGACCTTGAAGGTTCTGAGGAAGCCAAGACCTGGGACAAAGTTCCGACTCTTAAGTTGCTCCCA

GGTTTAGTGAGAGGGCCTTGTGTTCACTTAAGTGAACAGTAGTTGAGCTGGAAACCAGTCAGCACCTTAAGG  
AGGGAGAGGGTCATGGAGCTATATCAAAAGAACTTTTTAAAAAGAGAGGTGATACTGGGATTTTTTTTTCCCC  
AGCTGAGGGAAGGATTGAGGCATTAGGGGAAAGATGGTTCAGTCAAAGGGATCGGGCCTTCTGTGAAGATACA  
GAGGCTTAAGAGGTAAACAAGCAGGGGAGAAAGGGAAGTATGGGTGATTGGGGTGGGGGAGGGATGGAGGA  
GTCCCTTCCATGCCAGGGACCAGCACGCTTCCTGTGATGGGAGTGGACTTCTGTGCAAGGGGGACGTGGCATCC  
TGGGAGGTTCCATTGCGGAAGTGGATGCATTAGGTTCAAGGCTAACGCTGCAGGAATCCTGCTCTTAAATAAG  
ACAGTAGCTGCTGGTGGTGAAGTGAAGCTGGCAGGGGAGGAGAGGTGTTACGGGCTGCAGTAAGTGTGGAT  
GCTCTAGAGAGGAGACTGGGAGCTCCATCCGTGGAGCCTCTTGGGTTTCTCTTTCGGATGATTAGCTGCGTGGTG  
GTTGTATTTGTAGAAGCCAGAAAGTTTACCTTGAAAGGGGAAGAAAAGGCAACCGGGAGGTGAAGAGGTTGGAT  
TTGAGATGCAGAGGTCTGATCTTGCAAAGAAATTTTCAACAATTCAAGATTATGTGGGACTTCCCTAGTGGCT  
CAGGGGTAATGAATCTGCCTGCAGTGTAGGATGTGGGTTCAGTCCCTGGGTGAGGAGATCCCCTGGAGGAGG  
GCATGGCAACCCACTCCAGTATTCTTGCTGGAGAATCCCATGGACAGAGAAGCCTGGCGGGCTACAGTCCATG  
CATGGAGTTTCAAGAGAGTTAGACATAACTTAGGGACTCAACAATAACAAAAAGATTATGTAGCTGGTCATCGAA  
AAGGTAAATATGAAGTGAAGTGGCAGAAAATTGGAGAGGGGTGTGGGACCCAGTTCTAGGAACTTGAAGG  
GTAGGCAGCAAAAGATGGACAATTGACTTAAATTTGAAAGTGTCTTTCTTTAAGGCGTGGGGCGGGGTGAGGG  
GGAGAGCTGGACATTCTCAGAAAAAGTTAAAGCAAAATTTTAAATGCACTCTCAATTTAGGAACACAAAAATGTC  
TTGCATATAATCTGCCTAGTTATACTAGTGTTCACTGTACTTAACCATTTGAAAGGCTGATTCCGAGGAGCCTAAG  
AAATCTAGTTATATAGTGATTTTCAATCTTTTCTTTTCTTTTCAACAGTCTTTGAACATTGTTTTCTCT  
AAAATTTGCAGTTTCTAGGCTTTTACTTAACTTTTCTTTTCCAAACCTTTACCTAGAAGGGACATAAAAT  
TGCAAATAGGTTTGAAGGTAAGATGGAAGGCGTGGAGTGGCTTGAAGTTTTATAAGAAAATCCCAAATG  
CTTTGTTCTTTTCTTTTCTAGGGGTTGGGGGAGTTAGAATGAGTCTTTGGCTAGAGCCCAAAGTCGTCTCTCTG  
TGGGTTATATTTCAATTTATTCATTTGCTTTGCTGCTTTTCTGCTCTCAGCTAAGTGTGAGCTTGTGAATAAGAA  
ATGCGGTCCAGGAATTTAAGAACAAACAATTGTGTTTCTGCTAGGTTTAAACCTACTGCAACCATTTCTGATGCAC  
ATTATGTAGAATACGGGAGTTAAAAAAGGAAATGGCAGTAATAATGCCAATCACGCCAAGGAAGATGTTCC  
AAATCCAGGGTGAATACAGTATTGTTACACAAATTTAAACGCTGAGGGGTTGCTAACACAGCATAGCTCGGT  
TCTGTACCCCCCTCAGACTTTGCAAAGATACAAAGAAATCTAGGCATCTCAAATCGTAGTGTATCTCACGAGC  
CCACGAAAAGAAGTTAGAGACTAATTTCTACTCCAGTTAATCTTTACTTCTCATGAGTTTTTCCCTTAACTTTCT  
TTGCTTTTCTAAATTTCTATGTCAGTGTAGATGCTGGCAGGTGGCCAGCTTTATTCTAAGAAATTTTTTTTCC  
TCAAATCTCCAGGGATCCTGTTTTGTGAACATTTATTTTCTGATGCCACCTGTAGGATGGATAGTCTTGGCCTCA  
TGAGAGAAGGGATGGCTCAGAAAGTGTATCTTATTACAGAAGTATCAGAAATTTCTTTGTGCTCAGAGGGGAAG  
TGCTACAAAAGTGAATTAATTTTACCCAGCATGTGTGATTGTCAGGCCTGAAAATGTGCGAGTTTCCAAAAGCAT  
CTGTTTTTAAATACAGTATCCCTCTAAGCCGGCAGGATGTGTTTTGGGCCAGGGAGGGGACACACACAGCTCT  
CTCCACTGTGACATACACTCACACTCCCTGTCTGTCTGTGCTTCCGTGGGATGCTGGGTGACGAGAGGCTGA  
AAGTGTGCGTAATTGCTTCTCTGGGCCCTGCTTATCTGAGAAGAAACACAAGCTGTCTGGAGTCCAGTCAGCC  
TCCCTCTGCCAGATCACTGTGCTGTGAGTCTGCCTTCTCACCTCTTACCCTTCTAAGCCTGTTTCTTTTCTTA  
GGAATCCAAGCATTTTCCAGCAGTGAGCAAAACAATAAAAAAGGTCAGAGTCAGTGTGAGACCATTTTTGT  
TGCAAACATATTTTTTTTGTGCTTTCACAGGTATTAAGGAGGTTGGAGGGATAATCGAAGATCAGGTGCATGGCTC  
CAGTATAATCAAACTTATAAAAGCATTTATGGATTCTTGGCAGATTGATTCACTAAGCATCTGTGGACTAATGTG  
TCTCTTTAAGCACTGTGCTTTTCGATATTTTTCTTGGAGTATAGTTGTTAATGATGATGTCTTACTTTCAGGTGAT  
TCAGTTATCCATATACATGCATCTACTCTTTCAAATGTTTTCCATTTAGGTTATTACAGAGTATTGACCAGGGTC  
CCCTGTGGTGTACAGTAGGTCCTTGTGGTTATATTTTTAAATACAGCGGTGTGTATACTAAGTGTGTACTTTAGC  
ACAGCGTGCATTTGACACAATGAGGTGTTCTCATGTTTGGGGATGAGGAACTGAGGCTCGGAGAGATTAAAGT  
AATTAGAGGTTTTATTTGCAAGTGGTGGTAGGAGCTGAAAATCTCTATAGTGGTATGTGAGGTTTCATGTAAATCTG  
GGCCTGCTGGTCTCCTTGACCTCATCCACCAGGAGTCACAGCTTCATTATGCTTCAGCTGCTGGGCCTTACTTAAG

TCTCTCCAACATGCCAAACCTGTGCTGCCTCAGGGCCTTTGTGTGTGCTCTCCTTTCTGCCTGGGAAACCATACAC  
CCAGGTATGAGGCAGCCTTGTCTTCTCATTCAATTCAGATCTCAGTTCGCATGTTACCCAGAGGGACCTTTGGGTA  
ACAAGTTCAAATGAGCCCCAAGTTCCTCAATCACTGCCAGAGTCTCTTATTTGCCCCCAGGACTTCTCTCTACT  
GATATTACCTTGTGTACCTGTCTTGTACTGCTGGAATGTGACTCTGGTCTTATTTAAGGCAGTAATCCAGTGCCTA  
GAACAATGAGTGGAAGTGCCAATACATTTGTTTGTGTTAAATGACTGGAATACAAACCAACTTGTCAAATTCT  
GAGGCCTGCGATACACTCCATCGTCTAATCCTTTTCCAGCAGTTTTTCAGTTCAGTCACTCATTCTGTGTCCAATTC  
TTTGTGACCCCATGGACTGCAGCAGCCAAGCTTCCCTGTCTATCACCAACTCCCGGAGTTTGCTCAAACCTCATGT  
CCGTTGAGTCGATGATGCCATCCAACCAGCTCATCTCTCTCGTCCCCTTCTCCTCCTGCCTTCAGTCTTTCCTAGA  
TTTTCAGCATTTCCTCAGCAGTTTTTAGATTAAATCTTAACGCTGCCTTCAAGATGATCACTTCTCGATTCCCATTAA  
TTACATCAGCAAGGACAATTAGCACGTGCTTTAAGCCAGAAATTTGGATGGCAAGTGATGAGTCCCATGGAGA  
TGAAGAGGGTGCGAGAGAAAAGCTGATTTTCACATGTAAAGGACTACTTCCCTTTGTCCAGTAAAAATGGAAATC  
GAATACATATTTCCACAGAAGCAGGAGTGAAGTGTGGGCCGCCAGAGAGTGATAAAGTTGAGTAGAGCAGGG  
TGACTTGGATTCTGCTTTGTAGATGTGCTGTTGGTTTCAAAGAGTTAATGGTAACAGCCCAGGTGGAATTGATT  
TGGAGATAGACACACAGGCCTTTGATTCACTAGCCTCCAGCTCAGAGAGCCTTCTCTGCTTTGCAAAGTGAGA  
AGGCAAGCAATGCAGGGTGTGTGGGCTTTAGCAGGCCCTGTCCAGCCTGTGAGCACCTGTGTGGAAGCCATGA  
GGCCGCCGCTAATCTGAGCCCTATGAACCCCTAGGGAGGCACCTCACAGCCACTGGTCAGCCTCACAGACTCAG  
GAGTTGCTTTTATCCCTGTAAAACACAACAGATGACAGGTTAGGATGAAAGAAATCCAAGTCATCCTTACTTTGG  
TCATTGGATTGTCTGTTAATCGAGCCCACGAAGGCACTCATGAAAACGCAGGCCATTGGCATATTCTTGTTTATGG  
CTTTCAGGTCCAATACTTGAGCCTGAACAGACTTTTTATTTTCTAGTTTTCTTTTTGGCTACCTGTGTGGCAGGTG  
GGATCTTAGTTTCTTAACCACTGGGCCACAGCGGAATTCCAAGAGCAAACCTTTTTAACTTTGCCGTCATCCAGT  
GTCTGACAGTCTTGAACCAAGTGGTATATAATCTTTATAATAGTCGATTCTTGACCAAATAAATCGTCAGTACTCT  
CTAAGATCCCCTGGAGAAGGGAATGACAACCCACTCCAGTATTTTTGCCTGGAGAATCCCATGGACAGAGGAAC  
CTGGAGTTGGACACTGAGTGACTAACATACACGTTGAAAAAATGTTATACCTTTTTTCCCTTTGTAAAGGACC  
TAGGACAAGTCACTTAAGTATCTTGTTCCTAACTAAAATATAGAGGTGGAGAGACAACGCTTGCTATGCATTCA  
AAGAGCTGTAAGTTTTTCTATTTTATCCCACTTTTCATCTCCTCTGTGTGATGCCAAGTGCTGTGGTGGCCCCGCCG  
CCCAGATACATCCGGGGTGGAGGGGGAGAGACTGTTTGGGAGGAAAGGTTTTAAGCCTGAGATTGTTTTGTTTT  
GTTTTTCTTAAGCAAATCAGTGCCTCTTCTGGAGAACTGGGTGGGAGTTTCTGGGTGTGAGCTAACGGCAGGAA  
ATGACCCTCTCTAAACAAAAGGACTCTTTAAGGCCCATCTGAGTCTTGTGTTTCTCGAGGAGGGGTATGCAG  
AAAACCAGAGCTAGGAAATTAATCTCTGCTTTTAGCCTTTGTAAGCGGGGGAGGGGAGAAAGAAGAAGATTCCT  
TCCCTGCTCGCCCTCTAAACGTCCAAAGGGCCCGCCAGTACCCACTGAGTGCCAGAGAGGTTAAGAGCAAGG  
CAGCTCTTTGGGCCAGTGTGCCTTCATGCCACAAACACGCAAGAAAAACCAGGTTGGGCAGAATTACACTCAC  
TGTGACCTTCAGCTTTAACCTTGGCTTTCAGCTGCCGCTTGAAAAATCTATCACCAGCAAAATGCAGAATGGGG  
AAAGGAGAAGAAAGGAATATTTGTATGATCTATTAGTTGGGGTGCTGAAGTTTGCTAAATAACGTGAACGTCGC  
TCAGTCGTGTCCGACTCTTTCGAGTCTGTGGATAGTCCATGGAATTCTCCAGGCTAGCATTCTGGAGTGGGTAG  
CCTTCCCTTCTCCAGGGGATCTTCCCAACCCAGGGATCGAACCCAGGTCTCCAGCATTGCAGGCAGATTCTTTA  
GCAGCTGAGCCACCCCCATAAATAAATCAAATATTTGAATACTACATTAACCACAGTCTTCATTTTTCTAAATCTTG  
ACAGAGAAGAGCCGGTGACTTCTGCCAGTTGATGAACACAAGGCTAAGCTTTTCTGTGTTAGATGGCAAGCCCCCT  
ATGAAGAAGTGTGGGCCCTTGCCCTGCTTTGGCATGCTGCTGCTCTTTAAAGTGACCGTTTCATTGGATTATGTA  
TCTGTAGGGCCGAGTCCCTCTGCTGTTCACTGAAACTACCGCAACATTGTTAATTGGCTATACATCAATACAAATT  
GATCTTAATGACCATTATATCAATATTTACACTGCAGGATTCTGAATTTATATTGCTAGGAAAGTGTCGATAGTTCT  
GTCTTATCAAAAATATTTTGTCTTTACAAATCTTGCTGACTTGCAGCAATGAACCTTCTCCAGGCACACCACCTTT  
ATTTTTTTTTTAAAGGAATATAAATCTTCCACTAATAATTAGAAACACATATTTTGTGAAATGGTTTTGTGGTTT  
TACTTCATTTTCAGAGTGAAAACGACAAATATCTTCTCCAAGAACTTCTCAGCCTACTATTTTAGGCTTTATATT  
GTAAGTGTATTTTGAAGAGCCTGCCGATGTGTTTGGTGGGTACAATGTGGTGGGGTGGCGGCGGGGGGGTGC

GGAGGAGGGTAGAGAGGTGGATTCTGTCACAGCACCAGACACTTAACAGAATCGCAGAGATAAGATTAAAGCC  
AGTGCTTGGATCCCAGAATGAAAGGATTTTGTCTGGATGTTGCATGTGTTGAAAGACTCTGTATCTCAGATAGGA  
ACTGAGTGTAGTATCATTGTAAATCCAAAGGTTTACAGGGGAAAACACTACTCTTGTTAAATCTAGTGTCTGATGCA  
TCAGGAGGTTTTCTCATTTTCTTAATAAACTTGAGAGAAAGGTTACTATTGTAGTGTAGTAATTTACAGATAGGAA  
AATTACACATTGACTTAGATTCTTTGGAGGCTTATGGTATACATTGGCATGTGTTTTTCATTTGCGAAAGATGAC  
TTATTTTTCAGTTATTATCTGTGGAACATCACTTGTTGTTTTACAAAGATTAAAAATACCAGCGATGATCTGCTCTCT  
GCATTTAAGCACTTATTTAACTACAATGTCTGGCCGGCCAGTAGAGTTCTTTACATTGAGAACCATCCTGGAACCG  
TCCTGGGGGTGACTAGGACCAAATCCCAGCCTGCATTTTTTACACAGGTTAGTGTGTGGTTTAGCTGGATTTTGA  
GAATGAAGCGTGTCTGAATGTATTGGGTGGAGGGACAGTTCTTTCCCCTAGCTCTGTCCACTGGTGCAACTCCTG  
GTAAACCTTGAAACAAACTGAAAATATCCTGATCAGGAATGTTCTTGGATGATCAAAAAGGAAGCGTCTTGCCAGA  
CCGGCATCTGTTGCTGTTTGGTCATAGTGCACCCAGCCTGCTGACGTAAAAACAAAACAAAAGCCAGTAGGGAG  
GGAGCAGAGAACTCAAAAGTACGCGTGGGGCTTTGAAATATGGTGAGTTTCTAGTTTTGGCAGATGATCATTGGA  
GAAGTTTTAACCGTTAAAGTGCCCTTCTCCCTCCCAAAGCCCCCGGTTTTAATGAACAATTAAGTAGTATGAA  
AATTGCTCTTTATTACTATTATAAATCATGGGTCATGATTATACAGAAATCCTATTGGTCTGAGCTTATTCTGA  
GTAAAGTGTTTTCTTTTGTTTAACAAGTCGTGTTTCTAAGTCGTTGTCTGACTCTGCGACCCCATAGCCTTTAGC  
AAGCCAGGCTTCCCTGTCTTCACTATCTCCCGGAGTTTGCTCAAACTCCTATCCGTTGTGTCAGTGATGCCATCC  
AACCATCTCATCCTCTGTACCTTCTCCTCCTGCCTTCAGTCTTTCCAGCATCAGGGTCTTTTCCATTGTGTGGA  
TCTTCTGTCTGGTGGCCAAAGTATTGGAGCTTCAGCATCACTCCTTCAGTGAATATTCAGGGTTGATTTCTTTAG  
GATTGCCTAGTTTGATCTCCTTGCAGTTTAAAGGACTCTCAAGAGTCTCCTTGAGCACCACAATTCAAAAACATCA  
ATTCTTTGGGGCTCGGCCTTCTTTATGGTCCAACGTCACCTTCATTCCCAGGTGGCACTAGGTGGTAAAGAACGT  
GCCTGCCAATGCACGCGGGTTTGATCCCCGGTTTGGGAAGATCCCCTGGAGGAGGGCATGGGAATCCACTCCAG  
TATTCTTGCTGGAGAATCCCATGGACAGCCTGGCGGGCTACAGTCCACAGAGTTGCCAAGAGTCAGACACGAC  
TGAAGTGACTGAGGACTCAGCACTCACATTCATACATGACTTCCTTATTTACTAATAAAGTCAGTCCCAGGTAAAA  
GCTTGGGTGCTGCTCACAGCAGGAGACCCAGGCATAGAAATCCAGCAACTTGACCTCCATTGGGACTGACATAT  
ATATATTACTATGTATAAAATAGATAACTAATTAGAGTCTTAGAGAAGACGAACAAAGACGGGGCTACAGACTTA  
TCCACTGGCATGCAAAGATACTCATAATGTCAAAAGAAAAATCAAATGTAACATAACACTATTATGGTATGATCTTA  
TTTTTGAAAAATAGAGGGGAGTGAGTGTGTTTATACTCATACACAGAAAAGCATATAAATAAGATATACACC  
AAAATATTAACACTAGTTGTAGAGGAAGGAATTACAAGATTTTAGCAAAAAGAAAAATTTAACAATTTTATAGCT  
TTTTTTTTGCTTACCTTTATATTTAAAAAATAAAAGATTTTATTTTGGGGGCAGGGAGAAAGTGAAGAAATTTGGA  
CCTACCCAATGTCATCCAATTAAGTCAACAAATGGTTTATGCATTTTGGTAGTTTCAGTAATACAAACCAGATAAA  
TAAAAATCCAGTGGAGCTATTATTTAGTGTTGGAAGAAATGACTGCAGTGTTAAGTGATAAAAGGATTTAAAA  
TATGCAGCAGTAACTTTTGTACACTGAAGCTAAGCTGTGGCCATTACAGGAGTGGGGGCCACAGATGTCCAAA  
ATAACAACAAAAATGGAATTAACATCCTACAGCTTTGGACAAAGGAAACCACTCCAGGATTATACAATGAACA  
GTATGCTTACTCTTCATCCCAAACCTATTTGTATGGCTGCAAATTAACCCACCGGGGGTGGGTAGCGATATATTTA  
CGGTATACCTTTTCCAAGGAATATGACTGCAGTTTCAGTTTGGAGAATGTAATGCCTTTAAGTTTTGTGGCAAGAT  
TTCAGAACGTATGAGGATGAGTCTGAGGACTGCCAATCTCCCGATTTATCCACCTCCCTTTTCCCCCTCTTGGTG  
TCGTTATATTTGTTCTCAGCCCCCTCTTAATTCTTAATACTGTGCCGTGGTAAGAATGTGCCTTCATATATTGAACC  
ATTTTTGTACTGAGCAACGAGTTTGTTTCTAGCTTTGTGATATAAACTATATCCTCCTAGCTAAATCTGTGTGTAC  
ACCCTTAGTTGATTTCTTCACTTAGACCCTTAGAAGTTGTAATTTCTGGGTCAAAGGACTTCTATTCTTTTTAAA  
GACATTTAATGTTTATTGCCAAATCTTCTCAAGAAACAATTGTAATTTATACTCTACCAAGAATATTAGCAG  
GCCATTTCTGCATCCCCGGCCACTGCAATTTTTAAATCTCTCAAAGGTTGCTTCTTACCCAGTGGCTCAGTGGTA  
AAGAATCCACCTGCAATGCTGGAGACTCAGGTTCAATCCCTGGGTGGGAAGATCCCCTGGAGGAAGAAATGGT  
AACCAATCCAGTATTCTTGCCTGGGAAATCCCAAGGACAGGGGAGCCTGGCGGGCTACGGTTCATAGGGTCAC  
AAAGAAGTGACATGACTAAGCAACTGAACACAGCACACACTGATCTGTACAACACTGGGGTGTACACTTTGA



ATATATATATATGTTTTAAGTGTGCGATTATTTATTTGGCTGCATGGGTCTTTGTTGTGCCCCACAGGATCCTCCGTC  
TTCGTTGGCAGCATACAAGATCTTTTTAGTTGCCAGCATGTGAGAGCTAGTTGCCTGATCAGGGATTCATACCCAG  
GCCCCGTGCATTGGGAGTGCCATGTCTCTATATTGACTTCTTTAACCCCACTTCAAGACAACCTAGTTGTCTCAGG  
CACTGCTGTAGGCACTAAAATATTTGGCAGCTCATTTCTGGAAGTGTATTGAGTTCCTTGAACCCAATGAAAAG  
TGTTGATTTTGTGATCCTTGATGTATATTTAGGTCCTTGATGTATAGTCTGGCTAAAAATGTAATGACTGGGTGATG  
AGGCCAGTACTTGGTGTCTGAGTGCATGGATAGAAATTCATTGCATTGGTTGCAATATCTAGTGAACCACTAGCA  
CTGCTGATTAACTGTATTGTAAGATGCATCCTGATCTCAGAGATGTTACTTGGTGGGAGATGTCAGAGCCGGT  
GGATATGTCCTTGAACTCTACTTTTCTGTCTCATGGCTTGAGGTAAGCATAGAGACACTTGAGACACAGTAGT  
CAGTCTGACATAAGTTTTGGTAGACAGTTAGCCAGTTATATCCCTGGAAAGAACTTTAATGGACACAGTTAAAAC  
AGTAATGCCTTTCCTTAGGCATAGACCCTCCAGTGGTACTTTTCTCCCTCTAGATTGAGGAGGGAGCCTGGAC  
CTCGGTGTAGATACTGTCATGAGGATTCCTCAGTCTGAACAAGGGACCATCAGGACTTTCTCGTCTGCCCCAGAG  
GGGGTGTTTTACCGTGATGCCCATAGCGTACCAAGAGCTACATGTGGCTGAGGAGTTGGGCTCAGGTCTCCCC  
ATGTGGGTGGGCGAGTCACCATTAACCCAGCCTACAAGGTCCCCTAATTGTTTCCAGAACATTCTCGAGAGC  
ACACGCCCTCCACAAAGCCTACACAGATGTTCTTAGAGTGTGGCTCTAGGAAATGAGCAGATGTAATGGAAACC  
TCAGTCTTGACTCATTCTGACTGTTCCATATGAGTGGAAATTTGCATCTCATTTTGCATTTACTCGAACACTATTTCA  
GGGCAATTTCCATTGAGGTGATGAAATCCTGAATTTATGCACGGGGCACCTTTCTCAAAGGAACTGGAAGCTC  
TTTTGCAAAGAAAAACATGCTTTTTCCCTGAGGCTTTGATTGTGGTTGACAGATGGGGAAGGAGTTGGTGGAGAG  
ACCATTGATTAGCGGTGAAAGAGGTACATCTCCCTGGAGTTCTTTCTTCTTATCGCTGGTTCTTGTCTTGGCTGTT  
CAGATAGGATGTGGAAGTGCTACAGAGAGTTCTCTTGTCTGCTCGGAAAGACTGTCAACACAGAAGACAATGGG  
AAAATACCTCGAGTTCTTTGTAAATTGACGCTATTGTGCAATATAGACAGACAGCTTAGTAATTCAGAGATCAGT  
GTGGATGAAGAGGGAAACAGACTTTTAAGAAAGCAAAGAAAGATGGGTCTTCATGAACTGGGAGGATTTAAAT  
AGGTAGAAAGAATTGGGGACTGGAGCGGAGGTTACCATCATAAAGGGTTTGGGGGTAGGAATGAATGTGGCA  
TATTTCTGTGACAGCGGGGAGCCTTTTCTGGCTGTTCAATTTGAATGAATGGAGGAGTGATGATGAAGCTTGGAG  
AATATTTTAATGAATTTTTATCAATCAGTTTTTCATTGGTTCCCCAACCCAGACTTGGTCCATAAGTGACAGGTATAAC  
CCCCTGCAGAACACAATGCCAGCTTGTCTGCTAGCTCTGAGGGTAGAGAATCCGCCTGCAATGCAATCTTCAAT  
CCCTGGATTGGGAAGATCCCCAATGGCAACCCACTCCAATATTCTTGCCTGGGAAATCTCATGGACAGAGGAGC  
CTGGGGGGCTACAGTCCATGGGGTCTCACAGTCAGACATAACTGAGAGACCAGCACTTTCTTCTCCATATTTTAT  
TTATTTTTTTTTTTAACATACATGGCTTGCAAAGCCACCTAGCTGTTGAGATTAGCGTACTGGAAAAATGAAACAA  
TTTCATCTTTAACTCTTCCCATCCAGCTTCTCATTGGAGTCATTTACTCCATGAGGGCACTGGTTGATTTTCGTCTT  
CATTCTGCAGTAGTGGGGCTGCTAATCAGTCATGGTTGCCCTCAGCTTTAGAACTGAAAGTATAATTTCCCGGT  
GAGGCAGTCACTCCACATTTATTAAGTCCGGAATGTATTAGGCCCGGTGATAAAGGGGGCAGCGAACTTAGAC  
ATTGTCCTTGACCTTCTGGAAGTTCAGTGTAGTGAGGCAGCATATCCTAAACAAAAGCGCCAGTAAGTATAAA  
ATTATAAACAGGTCCAAGTCTCACGTCACTACTGGAAGAACCATAGCTTTGACTATATGGAGGTGTTACTTCTCAT  
AAATCAGCTGGCACCTGAAAACATTTGGGGGCTTCTTGGTCAAAGCATCTGACATCTAGGGAAGTAATTTGAAAA  
CTGGAAGCATTGTCTGCCACTATTTTTTTTTTTTTGGTTGTAGTTAGTAGGTAGGATCCTGGTTTCCGCAGCTGA  
CATTTAAAGCTCTCAATGATCAGGCTCTTCATTGCATTTCCAACTTGGCGTCTGCTGTCTGCCTGTGTGCATTCTC  
TCTTCTTAACCTTCATCCCTGCATCTAGTCGGGTGATGGTGTCTTCATTCAATCTTTTTTAATAACTCTCTCTCTCT  
TTAGTTGTTAAGTCATGTCTGACTCTTGCGACCCCATGGACTGCATGAAGGTATAATTCACAAACCTTAAAATTCA  
CCCTTCTGAAGTATAGAATTCAGTCATGGTTTTTTTTTTTTTAATATTTATAGAGTTGTGCAACCATCACAGCTCT  
AATTTTAGAACATATTTTGCTATCCCCTCTTCTCCCAAAATAAAACCTGTGCTCATCAACCCCTCTCCAGCCCT  
TGGCAACTATACTAACTTTTGTCTTCATGGATTGCTTATTATGGACATTTTGGACAAATGGAATAGTACAAAATGT  
GGTCTTTTGCCTGACTTCTTCACTTGGCATAATGTTTGAGGTTCATCCGTGTTGTAGCATGAATTCATACTTTG  
CTCCTTTTTAATGCCTGAATAATATCCGATTGTCTGTCTGTACTACATTTTGTAGCAGATTATCAGTTGATAAAC  
ATTTGAGTTGTTTATCAACTTCTGGGCACCCTGTTCTTAGAAAGTGACGATTCCACCTCCGGGTCCCTGACATGCT

TGTGCCTGCCCCGCTTTGTTCTGTCTTCTCCATGAATTTTCATCCCCTCCCCATTTCCAGGCTTCCCCTTGGGGCTT  
TCCTACTTGTTAGCGTGTCTGGCTTTCCCCATAGAACAATTATGTTAGTCTCTGACTTAGCACCTGAATATGCTG  
CCTAGTATTTTTACTTCTATCCTTTTCATGAACATCTCCATACATTTGTTTGGATCTCAGACTCACTTGCTTGTTAAAG  
ACAGTTCATTCAACAAATACAGAGTTGAGGATAAACCATTAATAAGGCTGAGAGTCTTACCTTTGTGGGGACAT  
TAGATTGTAGCAGAACTTAGGTGACTTTTTATTTAACTTTTAAAATTAATTTTTATTGGAGTATAGTTGGGTAAAT  
GTTTTACTGTACAGCACGGTGAATCAGCTATTCGTATACATATAATTTTGGATTTCTTCGTAGGTGGCCTTATTA  
AATACATAGATATTTTACTGCTATTCTTTAGATTTCCACCTGACCACAAGATACCACAGTGTAGATTCTCAGTAAA  
CATTACTTGATAATTATTGCATTGAATTTTCTTAACCTAAAAATCGAATGAGGCTACTTAATCCTCTCTGAACGGCA  
TAGGTTGCTGTCTGGTTTCCTACTGGCACTGTAATCACAGCTTTGGAGGTGATTCTGAAGGTGAGAGGATGGGT  
GTGAAGTGGCCCCCTGGGAGACTAGAAACCAGCTTGAGAGGACAAGTCTCTCATCCTCTCTACCCCATGTCTTG  
AGTCCAGACCCTCGCCGGCGTCTTATTTTGTGGGCTGTTGGAGTCTGAAGTCTTCGTTATTCTAAGGACTGG  
AATCTGGGGGAGAGAGAGGAGGGCGGGCGGAGTCTGTTCTCCACTTACTGTCCGAGATGAGACGCTTTCCTCCT  
CCTTCTGTTCATGAGGAGGAAAAGCGTTTACTCGGTTCTGATAAAGCTGAGGCTTGTCAGGCCCTGAGCAAGGC  
GCCCAGAGAAGGGCTGCCAGGCCAGGCTGGGAGCGCGGCTTGGGGGAGAATGGATGCATGTGCTTGTGTGGCTG  
AGCCCCCTGGCTGTCCACGGGAACTCTCACAGCATTGGTGCGTTTTTGTTCCTTGGCTGTGCCGGGTGTACTT  
GCGGCATGTGGGATCGAGTTTCTGACCTGAGGTTTGAAGCCGGCTGCCCTGCATTGGGAGCTCAGAGTCTTAG  
CCACTGGACCAGGGAAGTCCCTCACAACATTATTAATCAGCTCTTCTCCAGTTGAAAAATAAAGTTTAAAAAAA  
AAAAAACAAAAACAACCTTCCAGCTCCTCACGCAATGCGCCATAATCCCTATGAGGTCAGGTGTCTGGCTTGC  
CCAGCCTCTTTTGGAAATGGTGGTAGAATGGCTATCCCAGAGCCCTGTGAGGATTCAAGAGTTAACATTTGTAGA  
GGCCTCTGGAATGTTAAGTGCCTGGTGTCTTATCTCCTTTCTGGGCATAGTTGCCTTATAAGGCTGTCCACTGG  
GCCGAGGGACCTCTGCTGGGAGCTGGGCCAGCCGTGAGGCTAGATGACTGGCAGGCTGTGACAGTTTTCCC  
AGAATGGGCTCCGATTTCTATTTTAATACTGGTGATACCACTTTTTTTTTTCCCCCTAATTGTTAGTGTACGCCTC  
ACAAACACTTTACCCTCAGCTTTATTACATCTATTTTTAGCCCTCATCTCGGTGATTCTTCCCTGTGAAAAACAA  
GTATAGTAAAAATCCATTGAACAAAAATAACCCCGTCAAAGTTTTTAAATTTTCTTTTTTGGAAAGGAAGACTACTC  
ATCCCAAGACGTATTTTGAAGTAAATGAATTCCTTTTTTTTTTCTTAAGCTGTATTTGAAAAAGAAATAGCAGCT  
ATGACTTTCCCATAGCGCTCCTAAAATAATTGATGAAAAATGCACAGATATTCAGTCTAGAAGACTACGAACTTTTG  
TTATTTTTCTTTGTGAAACAGCTTTTCAAATAGCAGTATGTAAACATGGAACTTACGTGTTGAGAGCCGGTTT  
TAAAGGTCTTCTTCTCCTCCGGCCATTTACTCTTGACATGTCCATTTATGCTTATCAGAACTTTCTGGAGCTTGG  
CGGCACCCAGGAAGTGCTTTTGTCAACACCCTCCTCTGAGCAGTGAGTCAGCTGAAGCCCAAGGTTGGATCTG  
AAGCCCATTCCTTTTGAAGACCGTGCTATTCCAATTGACCCCTGTGTCTCTTCTGGGTCCCTTGATGTCAAGCA  
GAAGGACTCCTGTATTTTGTAGTTGGTTAACTTATAAAGTAGGAGGGATGATAGCTACTCTCAGCCTACTCCAGGA  
AAGGTGCTATCAAGGTGAATGGTGTAAATAGTCCAGAATGTTGTTTTGGGATCTAGAGACAGGGAGTAGAAGGT  
AGAATATTATGTCTTAGATCCTTGTTGATCTCTGCAAGTACTGAAACCTTGGTTCAAACCTGGCTTCTTTTTTTTT  
TTTAAATTGAACGTATCATCAGAACACAGGTATTGTGGGGAACCTCCCTGGTGATCCAGTAGTTAAAGACTCT  
GAGCTTTCTATGTAGGGGGCATGGGTTTGATCTCTCGACAAAAAAGAAAAATTAAGCTAATTAAGGAG  
CAACAGGTAAGTACTGAGTCATTGGTAACTATCTGTACTGGCTTAGTGGGTACCATCCTTTTCATTAATGATACACTTTT  
GCTTGCCAGGGCAGTACCTTGAGTAAACCTAAGTCTATTTAGAGGCAATGAGCAAATATTTTTGGTGAGCCT  
TGTACCTCCTGTATCTGTGTGAATGTTTATAGGCAATCTGTTTATAAGAAGTGGTGCAGAGTTGGGGAACCTTGG  
CCTTAGTAGTGGTGGGAAGTGGGACACAGTAGGCTGGGCCTGTTGCTGGTTAGCTCATTTGATGAGAACAGTATG  
CTCATGACCCCGGGTCAAGTGGACCATCTGTGTGTAGGCCAGCCAGCTCTGCTCTGCTGGGATTCCAGGAGGCT  
GGGCCATGTGTGTAAGTGGTACGAAGCTGGAGCAGATAGATCACCAGACCCAGGGAACGAATTCAAAAACA  
TGCCCTAAGGATGGAAGACTGCTTGTGGCTCTGAATTTATGAGTCTATCATAACAGTTAGACATTTTACACAGTT  
AAAGTTTTTCAAGGAATAACAAAATACATCACTCTCAAGGATCCTAGGAAAAACAGAAAAGGAAGAAAATAAAA  
AAAAGATCACTTTTCCCACTAGTGACAGATTTTATATTTGGGTTTTTCTCATTCTTGACACCGTCTATCCTTGACTT

TCATGATACCATGGACTTTCACTCTCCCCGCCGCTTTAACCTCACTCCTTTTCATCTGTTTTCTTGGTTTGTTCT  
TAGGTGATAGTATCCCTTAGCCCTCCATTCTGCCTTTATTTGCGATTATCCTACTCTTCCATGGATGATGTCCTTATG  
CCAGACTTCTCTCCTCAGCTCGATTCAAATATCTGAGTGTCCACACCACCTCCAGTTGAATGGCCCCATACACCT  
TAACTTACCATGACCAGTAGCTGATTTCAATTATCCACACCCCCCTGAACCTGCTCCCCTGTATTGAGCATCTGAG  
CCACCCCTTACCTGGGTGCCCACTTCTTCTCCTCGCTCCCTGTCTGTCTTCCAGTCCAACAGTTCATCCTCCCATG  
TGTGTCTCAAGTGTGTTGACTTCTCTCCGTCTCCCTGCTGCTATCAGGAGGGCCACTGTCAAAGCTTTCTGCACTT  
CTGTGCCAGCTTTTGAAACACCTCTCTGTCTCTAGTGTTACCTCTCCATGGTCCTTGATCTTTAGGACAGCCCGGG  
TTGCCCTTCAGAAATTGGAAGTATGCTCTACTATTCTGCTTAAACCTTTGGTCACATCCTGTCACTCGGTAGCCTC  
ACCCGTGACCCCGTCTCCTGCAGATTCTGCTTTTAATCAGACTGAACTTCACTGACTTCTCTAGTAGGGCACCGTC  
TCATTTATTAGGAAGCATTTTTACTGAATATCTACCGTGGCAGGTGCTGTTATAGGTTCTGGCAACATCTCCAAG  
GAGAATGAGGGGTCAGGATACACCTGGGGGAGGGCTCCCTAAATGGCTGTAAGAGCTCTGTTTTGGGGAAA  
ACCTGGGCCAGAACCGTGCAGTTCACTGCTTTCCGTGTGAGATGGCAGTGCTTGACATTCTGTGCCTAGCACAG  
TGCTTGGGATGCAGGAGGCACACAGTATTTAGCTTGCATTTCTGCAGGACTTTGAAGGATGACTCTTCAGAAGG  
ACTATATGAGAAGCACATTGTTGAGAGGAAGGGACATCTGATTTCTTCATCAAAAATTAAGTGTCTGAGGTTTGG  
CAGTGTGGTTTTGTGTTAGTTTTATACTTAAATGAGTTTGATAGGGCTGAATTTTCATTTAAGACGGTAATTCCT  
TTTTGTAACATTCCAAGTCATGTTACGTCGCAATGTGGGATTTTCAGAGTTGGGAAATTCCTGTGGAGCCAGGATA  
TAGAGTGATGTTTCTGGATATACTAGTGACTTATGACTTGAAAGAGTTGCATATGTAGTAGCCATGTCGCCTGCTT  
TGTCTTGGGTTTTGTTTCGCATCATCCTTAACAAATAAACTAAACAAAATGATAAAGGGTAGAAAAGGCCCTGCTCT  
AGTGAAGTCAGTGTGTAATGTTAATCCTTAGGAAATACAGTATTCTTTAGTCCTACAGATCCCATTCTTTGACCTT  
CATTCTGCTGCCTTCATGGTTTTTCATATATGTTTTCTTTTTGTGGGAGAAGCTTGTTGTGTCAAAAGGACAGATAC  
ATCTTTTTGCCCAATCTCAGAATACAGTAAACCTTTTGATAGTGTGTTGTGATCTCTGAAAAGTTTGTTAAATGTT  
CAGATGATTTACTTTTCATATAGCAACAGAGCAGAACAGATCACCTTGATTGGGCACCTAAGCGTTTACAGAATGT  
TTGCAATCATTGGATGCCTTCTGTTTTCTTCTCACTGTCTGCACCTCCAGGGACTTTTCTACCCAGTACCGGAG  
AACTGATACTAATCAGTGACTGAAATCAACATGGAGACTCCTCAGAAAACCTGTTGTTTCATGAACCTTTAGAGAG  
CTGCAAAGGACCCTAAATACGATGACTCCTCATTTTTCCATTGTTAATATAATGTACAAAGTAATAAGACATGATT  
TTTGATGTGAAAATACAGAAGTACATGCGGCAAAAAATTTCCCTCAACCTCCTACCTATCCTGTACCAAAA  
ATGTAATCACAGTTAATGATATAATATTTATCTTTCTTTGCACTTAGATGCAGATAAAAATGTCTTCTTACATGCAG  
TACATATGATTTGGTCCCTCTCTTTATTTAACTTGACAATAAATCTTAGATCTTGGGTATCAGAATGTACAGCCTT  
ACCTCATTCTTTCAATAGTTATATAGTATCTGTTGTATGGATGTACACTAATATATTTTACTACTTCTGCTGACAT  
TCAAGTTATTTTTCACTGCTTTTACCATTACTAATGCTATTGCAGGAAGCATCTTTTATGCATACATCTTTGGACAG  
GAGTGTGCTGGTATTTCTAACAGTAATAGAGTTGCATTTTATGCATTTAACTTATTAGAACTCAACCGTAATATGCT  
CTTATGTAATTAAGATGTAAATTTTATTTGCCTACATGTTCTTTATGATATATGTACATCAGTAAATAAGTTTAT  
ATTTATGTATATTATGCATATTCAAACTGGTAGGTTACATACACTTGGACAACCTAAAGGATATTTAAGGATTAAAT  
TTTTTTTTTTTTTTTTTACCCTATGTCATTTTAAATTTACTCTTTAACTCTGGAATGTGAGTGTAAATGTAAGATTG  
CTAGAATTGGATTTTCTGGGTGAAAAGGTTATATGCATTTAATTTTTTGATAATGCTGAATTTTCTCTAAAAAGAC  
TCATTAATACGCAGGTCCATCTAGTGTTCAATTTCTCACCTCCTTTTTAACATCAGATGTTATCTTTCTTTGCAGTCT  
TTGGCTGGGAAAAAGGCATTTTCATCACTTTAATTTGTATTTTCATTAATGAAGTTGAACATTTTCATATGTTCACTG  
GTTTTCTGCTTTTAAACAACCTGGTTAGTGGTCTCTCTTATCCAAGGTTTTGCTTCTGTGGTTTTGTTACTCACAGT  
CAACTGTAGACCCAACATATTAAATGGAAAATCCCGAAATAAACAACCTCATGAGTTTTAAATCTCATGCTGTTTT  
GAGTAGTGTGATGAAGCTTTGTGCCATTCCATGCTGTCCCATCCAGAAAGTGAATCATCCCTTTGTCCAGTGTATC  
CATCTTGGCCATGCACCCAGCAGTTAAGATGGGAAGAAGCATATGTAGACTCTGGGTTTCAGGTGTCCACTCGA  
GTCTTAGAATATATCCTCCACAAATGGTGGCTCAGACAGTAAAGAATCGACCTGCCATGCAGGAGACCTGGGTTT  
GATCCCTGGTTTCAGGAAGATTCCTGGAGAAGGAAACGGCAACCCACTCCAGTATTCTTGCCTGGAAAATCCTAT  
GGACAGAGGAGCCTGGGGTGGGTGGGGGGCGGACTACAGTTCACGGGATTACAAAGAGTCAGACATGACCGA

GCGACTAACACTTTCACTGTATTATAATCTTTATTTTCTATTGTTATTGATTTCTAGGCTCTCTTTATATATTATAAA  
CATTGTTTATGTACTTTCTAAAGTACTTTGGAAATGTTTCCACTAGTTTTTGTCTTGAAGAATAGGTCAAGGTG  
TGATTGTTTGCCTAGAAAATCCAGAATTACCAATTGAAAAGAAAAAACCTAGAATAAAACTTCAGTAAGG  
TGGCCAAACAGGATAAGCACAAAATCACAAGACTTTTTTTAACCTACCAGCATAGGAAAGCAGTATTAATAAT  
TCTAAATTTTAAGATACATTTTTGGCAGCAGTAAACCAACTTGAAAGAACAACCTGAAGAATACTGTATTGTAAA  
GAACACAAAAGACCCGAATAAATGGAGACAGAACTATATCCTGGATGTATATTGTAATGTTGCCAGTTTCCTC  
CAGATTAATTTATAAATCCAATAAAAAATTTCAAAGTAATTTTAAAAGAATTTGACAACTAGTTCCAAAGTTCAATT  
GGACTTAAAGATGTAAAGACAGCCAAGAAAACTTTGAAAAGAAGAACTATGAAGGGGGACTTTCCTCACCAGA  
TAGTGAAATCCATTTCAAAATGTTTTTAAAAATGTTTCTATGGTGCAGCATTTGAAACAGACGAGTTACTAATTG  
AGGACAGTGAGGTCCAGAAAGGTGAAATGAGCAGCTGAAGGTCATAAAGCTCAATTAGGTCATTTTTCATGAAG  
TAGAAAAATATTTCTCAGTTTTTGAACGGATGGCACACCATTCTAACTTTGAGCAAACTCCATTTGGGGATTTCT  
GGTTTCGTCATCTGCAAGAGTATTTTAGGAAAAGCATGCATTCAGAGAATCAACTGCAGAACATTCACAAAGCT  
TGAATAGAGTTTAGAAAAGGTGCTTGACGCGTAAGCCAAGCCCACATGTGTTTTGTGTTGTGGTGTGTTTCCTGG  
TGGAGGTGACTCAGTAGTTCAGAGGTGCAGGACTGGAAGGTGAGAGTTCTGGGGTGTATCTAGGAACAGGAAG  
GTAGGAATAGTTTAGAAATTTGGAATCAGTTGACAGGTTGGTTAATATTTTCTTGATATTGAGTTAAAAGTTTCGAA  
TATTGATCTGTTGCACATTATGAGAATGGCCAATTTAATTTATTTCCCATCGATTTCCCCCTTATGCTTTAAATGTG  
TGCTGTGCTGTAAAAATAAAAAAGGGCATGGATGGGAAAAGGGGTGTGGAGAAATTTGTAGTGACTTGTATGAAAA  
TTTGGCACAAAATTTTTTTTGACTGTGGCTGGTCAGCTGCAGAATGTTCTGTTTAAGGAACTGATAGCATCTTGG  
GTGGAGCTAGGAGCAGAATCATGTCTAATCACATACTTACCAACTTCCTGGCACTAAGAAAATTATCACCAGGCA  
GCAGTACCGGGCTCATGTAACTTTAGTTCTGGACAGGCACATCTGAACTAAATCATTTTTGAAGTAACATATTTT  
TGAGCAGATGCAGGCATTACTGGCTTCTCTTTCTGGTGATGTTTTCTCCATCCTCTTCTGTGTTTTGTCAATTGG  
TGTGTGTACGTATGGCAGTCCCATTAATAATGCGTTAAAGTACAAATATCATATCTGAGTCTATATTAGTGTGCT  
TAAATTTGAAAGTACGGTATCACATAGGTGATCCTTTAGAAGATTTCTATGTAAATCTGTGTACCTACTATTGCAGT  
GCCCTCAGGTCGCTTGTGGGCTACGTGGAAAGTATTAATGGAGGTTGAAAGTGTGAAAATGTTGGTTGTTTCAG  
TCGTGTCCGACTCTCTGCAACCCCATGGAAGTGTAGCCCCCAGGCTCCTCTGTCCGTGGAATTTCTCTAGTCAAGA  
ATACTGGAGTGGGTTGCCATGTCCTCCTCCAGGGGATCTTCTGACCCAGAGATCAAACCCACGTTTCATGCATT  
ATAGGCAGATTCTTTACCATTTGAGCCAAACGGAGGTTAGAAAAGGTTAATTGCTGTAAACAGATAAAAAATAATCG  
CTGGGCAGGGTATTGAGGAACGCTTGTAGAAGCAGTAGCGTTTGGGCAGGGGTGTGTTGGACTATCTACTGTTA  
CTTTATACACAAACCTGGTCTTTGTTTAGACATGAGAGTGTCCTATGGCACTTCCTTTGTAGGAACTTAATGTACA  
AGAGAAACCCAGATGTGTCTTTCTGAACAAAGTTAGACATATGAGGGTAGATTTTTGAAATCCTTCTACTTGGGCT  
CAGTGCCATTATGTTCTCTTATGTAGCCTAACACACAAGAATTTGCAGAACAAATATGTTAAAAAAAATTTAAAA  
AGCCCCCTCTTAAATGGAAAGATCCCATTCTTCATGGTATTGAATGGATGTGTGTTCAATTTTCAGTTCGTATTTGT  
CCACTCTTCATGCTAGAGGAACTCATTAAACAGGGATCTTTCTGTCTGCAGTAAGTGCCTTTCCAATTTAGTTGGTT  
TTGAAGAGGTGATGTGTCCATTGATCCCCACTATCTAAAGTAGGGTTGAGGGGTCTCCCTCATGGTCCAGTGTT  
AAGATATTCTCTTCCAATGCCAGGGGGCTGTGAGTTCGATCCCTGGTTGGGGAGCCTTAGCTCCCATATGCCTCC  
TGGCCAAAAACCAAACCATAAACAAAAGTAATATTGTAACAAATTCAATAAAGACTTTAAAAAATGGTCCATA  
TTAAAAAAAACAAAAACGGAAAGTAGGGTTGAGAAGCAGGACCTGGTCCAAAGACTTCGGAGCAGCTGAAAT  
GGGTATACATTGCAAAGTCCACACCCTCCTCGTTCATGGCTGTGTTTCATAGCAGAGCTGTTCAACCTCACTTCTGG  
CCTCTTTGCTCTTGAACAGCATCGCCATGGGATTAGCTATCTGGTGCCCCTACCTAGCCCTCCAGCTTTCTGCCCC  
CCAGTGTCTTACCAGGGCTTTTAAATTTCTTACCCGGACTAGAGATCCAGACGCTCAGACATCTGTACTGTGTGTC  
CCTTATCTCTTTGTTCCGTGTTTCCGTACCTTGTGGGTATTTATAGGTCACCAGTTCTGCTTTTGTGGAAGCCCTG  
GTGGCAGGGCTTGGCATCTCTTCTCTTGTGTACGTGGGGTCTGGTTGCCAGCTACCTTGGAGGGAGAGTGA  
GGAAGGGTCTAGAAAGGGAAGCCTGGAGTCTGGGTAGACTCTGACTCTCCTTGTCTCTAGGGTGGGCGGAGC  
TCCAAGGGCCCAGGGAATCTATTGCTGGGGAAACGGCCACTTCCCTTCATTTCTCTTTATGGTCTTTCTCTTC

TTTTCTTCTCTTTTTAGTTCTTCATCTCTGCTTATATCTCAGACCCACTGGTGCTCATCGGGACCCAAGAATCTGCA  
GAGTCGATCGGGTTGGGGGTGGGAACCTTGCTGAAAGAATAAGGTTTAACTTTCTGTGAGCAGACTCAGGGATC  
ACTTGAGAAGAAAGTTTTCGGGATGGTGGAGAGTTTTACTCTGGGTCTGCGTTCAGAAAAATGTAGATGACCTTTC  
AACTTCTTCAGAGTGCCTTGAGATTTGGCATGCCAGTGTAGGTTTTGAATCCCGGTCTCCTCTGCTGGCATTGTCA  
GTTAATAGCTGTGTTCCTTTGGGCAAGTTACTTGATTTCTCTGAGGCTGTGTCTTCCTGTGTAAATTGCCAGTCACA  
AAATCTACCACATCTGGGGCTGCATGTGGGCTTCCCTGGTGGCTCAGATGGTAAAGAGTCTGCCTGCAATGAGG  
GAGACATGGGTTTCGATCCCTGGGTGGGAAGATCCCTGGAGCAGGGAATGACAACCCACTCCTGTATTCTTAC  
CTGGAGAATGCCATGGACAGAGGAGCCTGGTGGGTCTGGTCTATGGAGTCCCAAAGAGTCTGACATGACTGG  
GCAACTAATACATATGGATTACAGCAATAGTAATAGAGAGTATGCCTCCTTGGATTATAAAGGTGTGTTCTACAA  
GTACAAAGCTACCATTATTATTACTACCTTTATTATTATTTTGAAGGGAGTTATCCTGGAGAAATGGATGAG  
GACAGGTTATGGAGAAATCAACCAATAAGCCTGGTTTTTGACATAGAACATTTAATTATAAATCACTTACTTCA  
GGGGACTTTTCTGATGGTCCAGTGGCTAAGACTCCATGCTCCCAATGTAGGGGGCCTGAGTTTGATCCCTGGTCA  
GGGTGGATTCCACATACCGCAACAAAGACCTGGGACAGCCAAAGAAAGAAATACTAAACGTGTTTTTAAAGAA  
AATAAAATCACTTTAGGTGCAGTTATGTTGGCTTAATAACTAGGTTTATAATCTGTTTTGTCTGCTAGCTAGGTAAG  
CTTTAACCTTTCTAAAGCCATAGTTTCTTCATCTGTTTTTAAGAAAATGATAATATCTACTTCATGGAAGTGTAAAGT  
AACCTTGATGTAAAACATGTGGCCGAGTGTCTGACTCAGAGCTTGACCTAAAGGATCTTATTTTTAATCTTAGT  
AAACTTTGAATGAGCAATAAATCTATAGTTAAATTATATCAGCGTATTCTCTGTTCTGGAACATGGCTGTTTGC  
AAAATTTTGACACTCTGTGTTATTTTCTGGAGAAAATATACATACTCAACAATAGCATGAGCCCATTATTAAGG  
AACACTCCTCCATAAAACCCCTTTTAAATTTTTTGGGCATATCATGTGGCGTGTGTAATCTGTTTCTGACCAAGGA  
TTGAACCCATGTCGTCTGCATTGAAACCATGAAGTCTCAACCACCAGACCACCGGGAAGTCCTTACTCTGCTCCA  
TTATTACTTGGGTAGAAATTTGTCTTCTTCAAAAGTTAAGCCAGCTCTCCAGTGTGTGGCAGTGGATGTAAGCA  
TGGATACTCCTCTCAGCATTCTCTGCTCCCGTGATATAAACATGTATATGTAGAATAAATTTTTTTAACCACCAAC  
ATCTAGCATCGTGAATAACACGTGGTAGTAGCTTAGTAAATGTCTCTTTAATTTGGTTTGATTTTCTGACTTTTAAAT  
GTTTTTTTAAAAAAAATATTTTTGTTTCATGGAGTTATAGTATTGCACTTGTAGTGGTTATCTTGGTGTGTTTGTTC  
ACACTGAACAGGAGGCATATTACTCTGGATATTGGCATGTTACTGAACATGACTTTTTTTCTCAGTTTTGTTGAAAC  
AGCTCCTTTCTTAACCAAGGAATTTTGGTGAGATTTGCGGTATTTGTCAAACACTAGCTTCCAGACACTGTTCTAA  
ACATCTTGCAGCCTTACCTTACTGACTTCTCACAACAATCCTATGAGGGAGTTAAACCGTGATCCCCATTTTCAT  
ACTTGGAGAAAGCACAGAGAGGGGAGGTAACCTGCCGGAGCTCACACAACCTCTGTGATCAGACTGGCAGTGAA  
CTTGGACCACCGCTCTGCCGTTTGTGCTGGGCATGCTGCATGCCCAAAGGCTCGTCTCTGTGTCTTTCATGAAAA  
GTGCTTCTAATCCCGTGGCTTTGTGCAGCAAAGAAATGGAACAGAAATAGAAAAGATGCTGACAACAGAGGAA  
TTGTGCTATGTTGCAATGCTGGTGATATGATGTAAGATGTGATGCTGATGACATGCTGGGTAGCAATGTTACAT  
TCCATCAGGGGACCCAGTCGCCAATCTGCGTATAAGCTTTCTTGTGTTTCACTCTTTGGTGATTATTATTCCTCAG  
AGGGCAGTCATCCTTTTAACTTGTGGTAGAAAATTAAGAGCGAGTCTCACTGAGGTATGGTTTATTTTTAAGTTTT  
CTTTTAAATATTAGTTTTGAGAAGTTAATTAAGTACCCAGCCTGTGAATCCAGCGTCTTGGATTTCCTCCGTGTCTT  
CCCCATTTAGAGGGCAGGTTTTCTTAGAGTTAGATTACAGATTGGTGAGTTTATGCCTTATCAGTAAATCATGAAC  
ATTTGGGGTCTGAATAGGTGGCCGGCTTGCTAATATGACCTGAGTAAAGTTAGGCAAACATAACTATCTCAGA  
TCTTAAAGGCATTTTGAACAGAGCCTTAAGCTAACGTGTTTGTGAGCTTTTCAAGTAAAGCTCAAGAGGCACGGA  
TACTTTCTCATTTTGCTTGCATGATTCTTTTTAACTTATTATGTCTTAGGGTTGCCCTGGTGTTAAAAGTTACG  
GGGAGGTCTGGTCTGCTTGAAAGCAGTGATTGTTGATTTGAGGGGTCAATTGATCCCTTTGAGAGTCTGGTGAAAC  
CTGTGGATATTCTCCCTGGAAAAACACACAGCAGTTTTGTTCTAACCCCTAAGGGCCACAGACCTAGACTTTA  
GAGTTTATGGAAATCCGTCATGGGAGCCAGTCACCTCCCTTCTATGTGCCATCTTCTGCCTGCCCGGCTCTAA  
AATTCAGCTAACAGGTTGGCTTATCACACTTACATTCTTGCTTGACCCCAAGGACTGTTTGACTCTGGGGAAGTG  
TTATCTCAGAAGGGAAGAAATGATACTCCTTTAACTCCACCAGATATTACCCCTGTAGGACAGGGCTCCCAAAC  
CTCCGGGATCTAATGCCTGGTGCCGCAAAGGTTGGGGGCGGTTGCTGTAGGAGACAGCTGTGAGTGGGCCCTT

CCTAGCCACCATTAGTCAGGTGGGGTGAGGCAGAAAGGGGCCAGTGAGCGAGCCTTCTCTCCCCTCCTGCCCC  
ACTGGATTCCGTGGGTTGCTCACCTTTATGTACCTTGGCACATGTTGTTCTCCACCTGGAATGCCCTTCCATTCTT  
CCTGCTCCCCAGGAATGCGTGCTCATCTTTCAATACCCAGCTCAAATGGAAGCCTGGCTGAACTCCCAGGCAGC  
CTCTCTCTCTTTGCTGTGTTGCCACAGCAATGTTTAAAGGCCTGGGTTACAGCGCACATACTGTGTTGTAATTAT  
TTCTTAAAAGTTTGGCAGGCTCCACCACCTGTAAACCAAGCACCTGTCTTAATTATCTTGATCACTCGGAACAGTG  
TTGGATGCTTGGTAGGTTTGCCATCCAGCGTTTAGACAGGTAGGCCGTGGGGTCAGGAAGGCGGAGTGCAGATT  
CTGCCTTCATGACCTTGTGAGGAAATGACTTCTCTCTGCCTCTGTTTCCTCATCTGTGGGCTTCTGGGGGCAGGTG  
GATGCCTGTTGTCTCTGGCACATGGTAACTAGTCAGCAAGTGCTAACCATCATGATTAATCATAATATTAAGCAG  
TTATATTATTGAGTGAAAAGCTCTTAAGTAATCCAGCTGTAATTGGAGATAGCATTGTTTAAAGAAATGTAGTCAG  
TGCTGTACTGTCCAGCCAATCTAGCTTTTATAAGGCACCCCAAGAGGCTTGGTAGGACCCCTACTTTCAGCCTAT  
TATCCATCTCTGTATTAGTATTAAGTGTGAATTATGTGAGGGCTTTAAACAGTTGGAAGTAGGTACGTCCTGTGG  
GAGACTTAGAAGAATAAACGCGTGGTTACCAGAGAGAAGGAGCAGGGGAGATAGATGGGGAGTTTGGAAGTGA  
CATGTATACATTACCACATTTAAATAGATAACCAACCAGGGCCTACTGTATATAGCGGACTCAGCTCAGTATTCT  
CAAATAACCGAAATGGGAAAAGACTTTGAAAAAGAATGGATATTTCTGTGGATATAACTGAATCACTTTGCTGTA  
CACCTGTAGCTAACATACCACTATTAAGTAGCCATACTCCAATATAAAATAAAAAATTAAATAAGTACTGTGGG  
GATATAAGACTTTCTTTTCTTTACCTAAAGAAAACGCACACAGTTTAAAGGTGTAGTTTAAATGTGTTCAACCTT  
GTGTTTTTCACATCACTTTCAGAGCATCACTAGCGATCTTTGGGAAAATGGAACAGGTCACCACCATGTGTAGCCT  
CAGCAGTAACATTGGGCCCTGTGGGAATCCCTAAGAAACACTTAATCACAAAAGCATTGCTTCTGCTTCTAAGA  
CAAGTCAAAGGTGGTGAGAAGAAAACATCTCGAAGTTTTTCTGTGTGTGTTTTGTTGCAGGCAAGCTAGAG  
ACATCCTGCTAAAGTCATAAGTGTCTAATCCTGCTTTAGAAGTGAAGGAGCATCACTGGTGCAGCCTTTTCTCC  
TTTTCAAATCAGGAGACCAAGGTCCAGAGAGTGGCTTGATTGCTGTGTGACATTGTGTCTGAAGGTGGGATGG  
CTCTATGCCGCCGGTCTCACGTGAGTCACGTGGATGGCTGTGTGACCGGGTCGGGGTGAGAGGGTGCTGGAG  
AGCCCATGGTCTCTGCGCAGGACGAGAGCATCTGCCTTCCAGCATGCGCTTGCTTCTGGAAAGCCTTCTGGACT  
CCCCAGGCAGTATCTCCTTTATGCTCGCAAACTAACTTTGTCTAAATTAAGCCGTGAAATCTAGACCTCCTG  
GAAGGGTATTACTTTTCCCTTTAAAAAAAAGTAAACAATTAAGCTAATGACAGTGGTGGAAAGCCTGAACTAC  
ATCATTCAGTGACCGATATATATGTCCCCCAATTTTGTAGGGGAATATAAGAGTCTATAATCTTACTTTTCAGTCA  
AAGTTTAATCAATTATAGTAGGTCTCAATACATGCTTATTAAGGTTTCTTTTTTGGGGGGCGGGTAGGGAGTCCTT  
AGGTACCCAGCAAGATCCCTTTGTCAATTTCTTTATTTTAAATTGGAGGATGATTGCTTTACAGTGCTGCATTGG  
TTTCTGCCATACAACATGGCGAATCGGTCACATACACACATATACACACACACCCTCCTTCTCCTCTTTCATCAGT  
TTCTTGCTTCTCTTTTCATGTTTTGGCTTCTTGGTGTCTACATAGTTTATAAGCTCACCAGCCCAATAAATGGTACT  
ATTATCTCCAGATTTCCATGCTTTACAAAAAAAAGTATATACTTGCTATTGTCTCCTTTTTCAAAGTGTGGGTCAG  
TTTGTGAATTTTAACTATTTTTCGCATGAAAGAAGGGAAGGAGGAAGTGCTGTAGAAGTAATTAATGCTAGTG  
GTTTATAAATTAATTTCTGAGCCCTAGTAGCTTGACTTACAGAAGGTTCCCTTTTGTGTAAGTATATGGTTATATA  
ATCTACACTTAGCAAATTTTGAAGTGTGAAATCTCACAATTCATCTGCCACTGTTGGCAGCACAGGAGAGAAC  
CATACTACTTGTCTAAGCTTGTAGTATTTCTAAGAAACAATAAGTTGCATGTCTTGATTCTCTGCTTCATGTAG  
AATCAGGATATTTGAGGGGTGAAAACAAAAGAGAGACTTCTCATGCATATCCCTGAAATGTACTTTTTGGACAC  
GTTGTTCAAGATCTAATAACTAGTGAGTTGTTGAATAACCTTGATCCATTCTCCACTGTATGTTACAAAGTAAATA  
GCATATCAAAGAACAGAAATGCAATCACGACAGCATTTAAAAAATTAGTGGTATTGAAGTGTACATGGAGAAA  
CCAGTGTTTTGAGTTCCTGGTAGCTATCTCAGTACTGATTGGAAAAAGTGGCATAATCATGCAGTAATCCTTTCA  
TATGTGTTTGAGAATATATGGGTAGCTTTGAGAGACATGTACTAACACTCTTATTTTTATGGGATACTGGGCTTT  
TTATTTAATTGGAGGATAATTGCTTTACAATGTCTGTTGGTTTCTACCATACGACAACGCAAAGCCTCGATAAGAT  
ACATATATCCCTCCCTCTTGAGTAATAATACCTTATGTAGTAGTTTGTCTAAAGGGCAAAATTTAGCTTCTTGC  
TTCTCTTCATTTACTTTGCTTGAGCTATGGATGAACATGCTGTGCATTTTTTGAACCCCATCTCTATAATTAC  
TTATCCGATAAGATGTATTAAGTGTCTCCCATGTACTTGGCACTGTACGAGCTGCTGAACTTAGACAAAAACAA

GGCCATTTTCTCAGTGAAGGTGATGAGAAGTGAAGCAGGTGACAATGTAGGAAGATAAATAATTACATGTGGGT  
ATGATTTTCTATATAGTAAAAATGGTTTTAAAGTGAAAAAGGCCTACTCCATTCACTCTCTTCTCTAGTTGAATTAG  
AGTGCTTATCAGTATATGAATGACTGATCATAAGTTTTGTTGTCAAGAAGACACTTTTAAAGGCTTCTGTGGTGG  
GTCAGTGGTAAAGAATCCGCCTGTCAACACAGGTTCAATCCCTGGTCCTGGAAGGTCCCACGTGCTGCAGGGCA  
GCTAAGCCATGCGCCCCAGCTGTGAGCCTACGCTCTGGAGCCCGGGAGCCACAGCAGAAGCCACTGCATTTA  
GATGCTTCTGCACCACAACACAGAAAAAGCCTGCGAAGCAACGAAGACCAGTACAGCCAAAAATAATAAAAAA  
GGAGAAGACTTTAAATTTTTGGTTCAACCTCTCAAAGATCACTTTTCTTGAGAACCAATCTTTAATTTGATTTACTAT  
CTGATAGTTGTTTAAAGTACTCTTTGGTCGAAAAGTTATGATTTTCCGTCCCTTTGAGATGTCCGGAGTCTTTGGA  
TAGATGGAAAATTGCAGTCAAGTCAGCAACCCTGCATCTCATTTACATTATTTATTTATTTTACTCTTAAGCAA  
GGCATCTTCCACCAGGACCTCTGATCTGGCACTGAGAAGTCTGACCGAGAGGTGCTCGCGACGTCTTTTGATCC  
TTGACGATGTTGGTGCCAAGGGCTATTTAAATCCTCCTTGAGTGATTTTTTTTTATCCCTTGAGGACTATTGCCTTC  
ACTTAATGTCGCTTACCTGTTTTGCCTTCCTGTCAACCAAGCCACTTTCTTTGTTCTTTGGCTGCAGTGAATCTC  
CATGAAGGTAGTTATTTTAAAAGCAGATGACAATATTAAATCAGTTCAGTTCAGTCACTCAGTCGTGTCCAATC  
TTTGCAGCCCATGAATCACAGCAGCCCCGGCCTCCCTGTCCATCACCAACTCCCGGAGTTCAGTCACTCAGTCACTG  
TCTATCGAGTCAGTGATGCCATCCAGCCATCTCATCCTCTGTGCTCCCTTCTCCTCCTGCCCCCAATCCTTCCAG  
CATCAGAGTCTTTTCCAGTCAGTCAACTCTTCGATGAGGTGGCCAAAGTACTGGAGTTTCAGCTTCAGCATCATT  
CCTTCCAAAGGGTTGATCTCCTTCAGAATGGACTGGTTGGATCTCCTTGAAGTCCAAGGGACTCTCAAGAGTCTT  
CTCCAACACCACAGTTCAAAAGCATCAATTCTTCGGCGCTCAGTTTTCTTACCATCCAACTCTCACATCCATACA  
TGACCACGGGAAAAACCATAGCCTTGACTAGATGGACCTTTGTTGGCAAAGGAATGTCTCTGCTTTTGAATCTGC  
TATCTAGGTTGGTCATAACTTTTTCTTCCAAGGAATAAGCGTCTTTTAATTTATGAGTGCAGTCCCATCTGCAGTG  
ATTTTGGAGCCCCCAAAAAATAAAATCAGATAGACTTCATTAATATAGCATGAGAGTATGGTATGCCTATTAGTC  
ATATGGCTAATAGTTTAATAGTAGCTATTGTAATAAAACCAAGTACAGCTTCTTGGCTCATTCGTAACCTTTGGTAGT  
TTCAATTATTTGTTACTATTTATAGCTTTATTTCTTGATAGAACAAGGCAAGGAATAAATAAATGGGAAAAATATCCTT  
ACACAGTTGCTTTCTATCTGGCTATATTGCAATGCAGGAAAAACAACAAAAGCACAACCTTTGAGCTCGGACATTC  
CATTGACTCAAGAAAAATCACCCAAGCTCTGAAGACAGCTTTTATTTGGAGAGCTAGACTTTCTGAGTTTTCTGT  
GTGGAATGTTCAATAGAAATCCAGTGCAAGCTTCTGCTCCTCTAAAATGATGATGACTTTTGCCTAAGAATAGACC  
CTTCTTTTAGTATAGAAACCAGATAAGCTGTCCACAGTGATCCAAACAGCTAGCAGCCTCACCCCCACCCCACC  
CCCAAACCTGAATAACAACACAGCAATATAATTTTACCGTTTAAAACCTTGGCTGACCCAAACATGAACCTTTCAAAG  
AAAACAAGAGTCATTACTAAAAGAGATTCCATTTCTTTCCGGGGCCTAATTTAAGATGACTTTCCAGAACTTTGAA  
AAAACCTATTCTTCCAATGGCCACTTAATTGTGAAACAAAAATAAACACCCACAAGGGAGGCAAAAGAGAGAGTT  
CTCTTATGTTTGGATTTTAAATATCCTTTTTTGCGGGTGAGCTTTTTCTTCTAGGGTTGTCATCCGTTGTTTGG  
AATGATTTATCAGGTTCCATCCGAAGATTATACTCTTCTGTGAATTTAAGGGTGATGATTTATGAGTAACTCTTAG  
TAAGACTTCATTTCTCAAAATCTGCCCTGTTAAGCGTCTCATAATACCTCTCTAATCTGTGTGCCCTGGGTATTTC  
AGAACCAGTGAGTGATGGTGTGAGGAGTCTTAAGCCTAGTGGCCTGGCTTCTAAGCCCTTGCTTGTGTTTAGTGA  
ACCATATTGCTTTTTATTGGGTATGCCTTTCTGAACATTTGGAACTTCTAGAGATCTGAAGAATTCCTTGGACAG  
AGGAGCCTGGTGGGCTATAGTCCATGGGGTCGAAAGAGTCCGACTTAACTAAGCAACTAACACTTTTCATTTTTC  
TTTTACTTGTGAGAAATTGAAACAGCTTTGGGGAATAAAAGAGAGCAGTCAAAGTAGCACAGCAGAGAGTGGAC  
GAGCTTTGAAGTCAGGCTGGGGTTAAATCCAGACTCTGCATTTTGAGACATTGTCTTTGGGTAGAATGAGTCTCT  
TTGGCCTCATCGGTCTTCATTTGCTGTAGCAGGGTCATTGGGATGATGGCATGATTGTATGTATAGGCTAGAATC  
AACTAAGATACAGGAGGAGTTTATGACATGATAGCTGTTTTACCATTTGTTGATTCTGTTATTGTAGTTGTTGACTGG  
ACCTAGAACCTCTGTGTTCTGATTTTTGCCATTGTGCACATAAGACCTGTCACTGTACCTACCCATGTTGTCTAAGT  
GGTGATGACTTCCAAGTGTGAGTTCCTTGAAGAATAAGATAACTGAGCAGTCATGAGTCTCAGGTGGTCCTAAAC  
CAATGCAAACTTCCATTAGGTGATTGAACCTGTATTTTATTACGGTTTGAAAAGAAAAAGTGAGAAAACTGTTC  
AGAATCGTTCATCAAGTCATTTTACTTTTCTAAGCAGTAAAATGAGGGAATTGCATTAGATGGTCTCTGAGTTACC

[illegible]



TAACGTTTATCAGATACAGAGTATAACTGGGTAGGTTGCCACTTCCGTCCTGTTTGCCACAGACTGACACTGT  
GTAGAACCAGGTGTCGATGGTGATCATTATTACAAGGGGTAAGGAAGACGATAGCAGCCCCGAATACCATTTTC  
CCTGAAACTTCTAAGTGACTTGGTAGAGGAAATACTTGTTCAAGCAAAGGTGTAAGTATTACCTTTACAGAGG  
AATAAGAATTATCATTAAAGTTCTACATTTGGAATTGAATTATTCAGTCCTTTATCCTTACACACGTGAGAAGGTGAA  
AGGCATTCAAGTGCAGACTATACTTCTCTACCTTTTTATGTTTTCTTTTCTTTGCATTAATGATATATATTATTTAA  
ATATCCTGGATGTGCCATGATTTACATTAAGTTTGATTTATTACATACAGAGCTAGAAAATAGAAAGACATGGTCT  
TATTTGAAATATCTGTTTGCAGAGGGGAGGTATCTGAATTTACTTGAAAATGTCAAAAATGCTCTGATACTCTAAT  
ACTGGTGGTTATTTTGACCTTATTTTAGACAAAAGTTAATGTGAGCTGTGATCAGTCACTACTGTGAAATATTGTTTG  
GAGGATAAACTTTGTGTGCGTGTCACTGAAAAGTAAATCTCTTTAATCCTAAAGCCAAATGGAAAGGATATGTTCT  
TTCTTCGGCGTTTCCTGTTGGGTCTTACAGGAAGAAGTTGAAGGAGTCATGAATTGGCACTTTCCAAGAACTTAAA  
AAGTAATTTTGATAATTCATAGAGCAAAATCTCCTTGGAGAGCCCTTTTCCAGGATAGCCTAATGACTTGGAGACA  
CTGATTCACAGTTTACAAGGACCCTTCTGGAACCTAAGAGCCCTTTAAATAGTCTGGTTTGCAGCGAACGTCTCA  
AAAAAGGAATGTTGTGAAAAATCTTTTGACGTTCTGAAAGCGAACAAGACAGAAGTTCGTCTTTAGAGAGTTAAA  
CTTCCATTGGTTTCTCTCTTGCCAATTGTTTCTTTATATCATCAAAAATTTTAAATCGTGGTTAAAAGATAAAATTT  
GCCGTTTTTTTAAAGTGACAGTTCAGTAATGTTGAGTATATTCACATTGTTGTGCAATAGGTCTTCAGAACATTTTTT  
TCCTAACAAACATGAAACTCTGTTTCTTTGCATTCCCTGCCCCCAGTCCCTGGCAGCCGTCATCTACTCT  
CTGTTTCTCTATATTTGTCTGCTTCAAATAACTGTGTCTAAGTGAGTCACTATGCCTTTCTGTGACTGGCTTGTT  
TCGCTTGGCATCATGCTCAGGTTTATCCATACTGTAGCATGGGTGACAATTTCTTCTTTTCAAGGCTGAATA  
ATATTCCATTGTATGTATAGACCACATTTTGTGTGGTCTCTCTATCGGTAGGCATTTGGGTTGCTTCTAGCTCCAGG  
ATATGGATTATGCTGCGGTGAATGTGGGTTGCGAATACCTTTATAAAATCCAGTTTTCAATTCTCCGGGATATAT  
ACCCTGGGATAGGATAGCTGAATCATAACGGTAATTCTATGTTTAATTTTTTGAAGACCTGCCATACTGTTTTCTT  
AGCATTTACACCAATTTGCATTCCCCACTAATGGTGAAGAAGCATTCCAGGTTCTTCACATTTTCAGCAACACTTT  
GGTGTTAGGTTCTTTTCTATAGTAATTATCAGTTTTTACATTAACCATAATGAACAAATACTTTGCGTGTCTGAGG  
GTACACAAATAGGAGATTTGTGTGTAGTCTGAAAAGCAGGGGTTGGATTGTTCTTTAACTTGCTTTTAAATAGGTC  
GAGTGCAGTGTTCGCTTGATTTTCAGCAAAGCCAGTAGGGGAATTTTTAACCAAGGTAGAAAAAGTGGTGGA  
ACATCATGGTAACATAAAGTTGCCGATTTCAAACCTTGGCACAACATTTATGCTGATAGAAAATAAGATAAAGTTCAG  
TCGACCAGATTGTAGGGGAAGCATTATTATCATGTACACAAGAGTTTACAAATAACAGGTGTACGTAGCGCACCAGC  
GTCTTTCTTGCCCATTAATGGAAATGTTCCAGAGACGGAGCAGTCTAGAAAGATGGATAAGGTGGTGGATCTCTT  
CAACTCCCCAGGGTTTCACTTTTTCCATCATAATGCTGCTTTTCTGTCTTTCTGTGATGGTAGAGGCTAGGTAG  
TATCAGGATTGCTTCCTTGCTGTTATGCCACAACATAATCTGGAGCAAAGGGCTGTGTGAATGTTGCTTGTTTAT  
GAAATACAGGCATAAAAAAAAAAATCAAATACAGGCATAAACATAGGCCCGGTCTGTTTCTTAAATACAGTA  
CTTATTGTACTTTTCCGAAGCTTAAATATGGTTTTTAAGAATTTTTTTTTCAGTGTCCCGCATGAATAACTTTGGTG  
ATTATGATTAGAAAACCCCAACCTCATTATCATCTGGATGCTGTGAAGAAAGAAAAGACTGCATAGCATAATGGTTA  
AGAGTTCAGGCTCTGAACTGCTTGAGTTGAAATCTCAACCTTTAACAACTTTGTGAGCTTGGGTAGTTTCTTGAT  
CCTTAGCCTCATTTGCAAAATAACTCCTATCTCCTTGGGTTGTGATAAGGGTGATTGGATTGATACAAGTCCACAC  
ATCCTTCTCTGAACTCTTTGGGAGCAGATGTGCTCCAATATCTTAGATTTTAAAGGTAACACAGTGTATAACCCG  
CGGATAACACAATACCCTCAGTGAGGTCTAAAGCAGAGCCTCTTACTTAAGCACACTAATGTTTCTCCAGTGAAA  
GAAATACGCTGAGGGGGAGAAATGAAAACCTTGTCATTTACAGTGCATTTGCTGCTCAGTGCATTTGCATACAC  
AATCCTTTTCCCTAACACGCCCAACTTTAGGCTTTATGAGCATTTAGGTTTTGGAAGTGGTTAGGAATTGGATCCA  
TACATTTGTAAGCATCATGTTAGTGTTTATTATGTGCAGAACTGAGTTCTTTCTATACTTGATGACCTTTGGCTTGTC  
ATTATAAGAGCAGGTAAATCATTGTGGTTTAAAGTGAGTATGGTGGGGTGCATGTACTTTTATGTATTTTTCACAC  
ATTACTATTTTATTGGGTTTCGGGTCTATCCCTTTTTCTGTTATAAACAACTAGAAAGATTGAGGACAAGGTGT  
GGCAGAAACATGCCATGTTCTTCTGAACTTCTTTTTTTTTTAAATTTTAAAGAATATCTTTTCTAGGACTTCTTT  
GGCAATCGAGTGGTTAAGACGCTACTTCTACTACAGGGGAGACGCTGCTTCTACTACAGGGGACTCAGGTTTGAT

CCCTGGTCGGAGAACTGGAGTCCTTAAGCCACGGGGAGAGGCCAGAAACAAAACCGTTTCTTTCAAAGATTTAA  
AATTTCTGAATTTTAAATCACAAACTGTGATTCTGCTTTCATTTGCCTCTCCTCTGTAGTGCACATTAAGAACAG  
AAACTGCCCAGTAAATCTTAATCTTTTGATCTGCTTTGCTGCCAGCGAATCATGGCTAGAATATCTGGTGTAGAA  
AATTTTTAATTTAAGTAAATTAAGTGCACCTCAGACTTTAGTTTCCTTTTCCAAAGAGAGGAGCCTCCTGAGCTT  
AGGACTGTGGGGTTAGCTGTCTTATATAAACTCATGGTTAGTATTACCATTGGCCTGAATGTCTAGCAATCTGGTA  
TGTTTTATTCTATTTAAAAAATTCATTTAAATCTATTAATCCATTGACAAATCTCTTGAAGCTTATATTAGAAAA  
TAAGTAGACCTCTAGGTTTTTCATCCTCTTTTCAACTACTGCGTGTATTTGCTAGTCAGAACCTGACCAAAGGACAA  
TGTGAAATGCTTGAAAAAATAGTGTATGCTTTTGAAAAGATACTATAAGCAGAACTGTGTACTTTGAGGGGCAA  
ATTTAAAAATTTAAAGGAAATGTTAGTATCCTTAAGTCTGTAACAAACATCGATCGACAGAAGTAATTAATACAT  
AGGTATTTAAGTACTACAGGAGAATAATCTTTAGATTAATTTGCTGGCATATATCTGTTTTCTGAAGAACTTCCAA  
TTCCACTTTTACTCATTTATAAATCAGTAGTCTATTAGTTCCTAAAAATAATTCTCTATAGACGCAAAGCTGATACT  
GGGGTTTTTAGATTCGTGTTCTTAACATTTCTTTATCACTTATCTTTAGTCTGCCTATAAATATATTTGTGTGAGGA  
CTTTGATTCCATTGCCTCGTTAAGGCATACCAATGTGGCCCACTGAAAATAACCTGGAGGGGGCTTCCTAGGTGGT  
CTAGTAGCTAAGACTCTGTGCTGCCAGTGCAAGGGGCCAGGTTTGATCCCTGGTCAGGGAAGTAGATCCTGCTT  
GCTGCACCTAAGGTTTTGCATGCCAAACTAAGACCTGGCACAGCCACACACACACACACAAAAGAATAACAAA  
AAAACATGACTTGGAAGGTTAGATCAAAATTGCCGGAAATCATCCTGAAGTGAGCCTTGTTCTTTGTATAAAGTT  
GCCTTGGTTGCTGCTTTGCATCATACTGATGTGGGGTATGTATTTAAAGATGATTTTATAGTTTAGTATAGTTTTTG  
TGTCTAGTGATGGCTCCAAGTTCACTTTTCTTTAGTGTGGTTAATCTGTGGGGTACATTAGGTCACTTGGTACAT  
TTTATTTTAGTAGTCTCACAGTATTTTAAATCTTAACATTTTACTCCTTTCCAAGTAAGGAACCAAGGCCAGCAA  
TCGCTCATGGTGAGGCTGCTCCGTTTTCAACCTCGCTGCTCAAAACCAAGGAGCTTAGGAAAGAAACCAAGAT  
GTCTTGGGTTCTTCTGCTTTTGTTTTCTATTTAAGGTTTAAACACAGGTAGATTAACTTTTAGTTTTAGTTAATAAA  
CTTGTTTTAAAGTGAGATTTATAGGATTTGAGTGTATGTGTGTGCATGCATGCAAGCCTGCAGTAGGACATTGAC  
TGCAGCAATGAAAAACAGGCCTGGGGCTTAAACATAGCAGATGTTTATTTCTACATGAAAGTCTGAAAAGTGGT  
CCGTGATCTGCCTGTGTGCTTGGTCCACATTCATCGGGGACCGTATTTTGTGCGTGTGCATCTTCAACACGTAGC  
TTTTTTTTATCTTATGGTCTAAGATGACTACTCCTTTCACCATCATATATATCTTCTGTGTAGCAGAAAAGAGGGA  
AGAGATATGGTGCTTTTATGGGACAACCTCAGAACTTGCAAGGCAGTTTAGACCTTACGAGTATAACCTTAACGAGC  
AAGGGAGTTTGGCAATCATGTACCAACTAAATTTTCTCAACGTTGGTTACTCATCAGTATTTACCAAAAGAAAA  
AAAGACCCACCAGTGTCATACAGAGGTCCATCTAGTCAAAGCTATGGTTTTTCCAGTAGTCTGTATGGATGTGA  
GAATTAGACTATAAAGAAACCTGGGCACCAAACAATTGATGCTTTTGAAGTGTGGCGTTGAAAAGACTCTTGAG  
AGGCCCTTGACTGCAAGGAGATCAAACCAGTCAATTCTAAAGGAAATCAGTCCTGAATATTATTGGAAGGAC  
TGAAGCTGAAGTCCAATACTTTGGCTACCTGATGTGAAGGACTGACTCACTGGAAAAGACCCTGATGCTGGGC  
AAGATTGAAGGCAGGAGGAGAAGGGAACGACATAGGATGAGACGGTTGGATGGCATCACTGACTTGATGAACA  
TGAGTTTGAGCAAGCTCATGGACAGGGAAGCCTGGCATACTGCAGTTTATGGGGTCGCAAGAGTCGGACACA  
ACTGAGCGACTGAACTGACTGACTGTGTTATATAGCCGTTGGGATTTATACATCACCAGTCTTGATAACCCCTGG  
AGAATATTTCTTACAGATCTGTCTATGTATAGAGAAGCATGCATGTGTGTTTGCTCACTCATGTCTGAATCTTTGTG  
ACCCACAGACTGTAGTCCACCGGGCTTTTCTGTCCATGGGATTTCCAAGTAAGAATAACTGGAGTGGGGTGCC  
GTTTCCTTCTCCAAGGGACCTTCCCGACCCAGGGACTGAACACACATTTCTTGCAATTCAGGTGGGTTTTTCACT  
GCTGAGCCATCGGGGAAATGCTACATGCAGAGAAGGATCTCCTAATTCTTAATTTAGGAAAGGCTTTCTAAGGAG  
AAAATTGTCACCAAAAAAATAAAAGTATGGTTTAAAAAATAAAATCAATAGAGGTTAAAAAGTAAACGTTTTTC  
ATCTAATTTGCTTTGAAATAGTTTTAGAGCTTCACTATGTCTGACAAAATGTTATTTAGCAATTATTTGGGGATTTTT  
CAGCATCTTTCTGTATCAGCAATATAGCTCTGTCTTCACTTGACAAAATGTTATTTAGCAATTATTTGGGGATTTTT  
TAATTAATTTGGAGTATAGTTGATGTACATCATTGTGTTAAGTTCAGGTGTTCAAGTGAAGTGATTGAGTTATATAT  
AGATCATTTTTAGATTCTTTTCCATTATGTTTTTTACAAGATGCTGAATATAGTTCCCTGTGCTACACAGCAGGTC  
CTTGTTTTATTTATATACAGTAGTGTGTATCTGTTAATCTATTTGGGGGATTTTTAAACAGTGCTGTTAATGTAGCTG

TCACATACTTCATTTGTGATTACATTTTTTTTTGTTAGTTGATGAATTATAGATTGCTCCCTGATTAACAGGTTTA  
TAAAGCTTCTTAGTTTCATTTTGTCTTGCCTCAGAAATGTATAGCTTGGTCTTGCAGTGTTCTGAATTTCTCTGAGA  
GTACATGTCATGTTGAAAGTCGGAGGCTGTTGGCGTGAAAAGCAGACAAACAAAACTGAGATGGTTGCCACT  
GTTAAATTTAGAATGAGGGACTTCCCTGGTGGTCCAGTGGATAAGACTTCATCTACCAATGCAGGGGGTGCAGGT  
TCAGTCCCCGGTTGGGGAGCTAAGATTCCACATGCCCTGTGGCTAAAAAAAACCAGAACATAAACAACGGAAGT  
CTTGTAAACAAATTCAGTAAAGACTTTTTTTTTTAATAATGTGAACCATTTTTAAACAATTCAGGGTGAAACATTTAAA  
AAATAGATCTGGTTTTAAATTCTGGATCAATTGTGCGTAAGTCCTTTCTGTTGAATATTAGAGTTTTAACAGATTGT  
ACGTTAGTAAAGCATTAGAAGAATTGGTATTTTTACATGTGATTTGAATGCTGTAACATTAAGGATGTATGAAGT  
TCTTTCATGTTTTTTAAAAAATGTATAGCGTGACAATGTTGGTAGAAGATGCCAAGAGACCTGCGAGGTTGTG  
CACTCCCAGTGGTTGGTCCCCATATCCTTTTTACCGTTGGCACAAGGATCCCCTCCACCACTGTTACCAATGTATA  
CCTACATTTCCCGAGTGTGTTGCCATTTCTATTCCAGGGGATCCTCCAGACCCAAGGATAGCACCCAGGTGTCC  
TGCGTCTCCTCCATTGTCAGTGGATCTTTACCACTGAGCCACCTGGGATGCCCATTTGTTGCTGTTAGTTGCTAAGT  
CGTGTCCAACCTCTCTGTGACCCCTGGACTGCAGCCTGCCAGGCTCCTCTGTCCATGGGATTCTCCAGGCAAGAAT  
ACTGGAGTGGGTTGTCAATTCCTTCTCCAGGAAGCCCATACTTGGGCCTAAAAGAGATCAAGCCCTAAAACCTCAC  
TCTCTATGTTTATAGCATTGTAACTTGGGGTGTGGTTAAAATACTGGGAATCTCTAACATGATCCTCCTCTTC  
TGATTTAGTCTGTATTCTTATATCCAGAAGCCACTTAAGTTGTGTCCCTTTTCCCCTCCAGCCTTTAGTTCTTCTA  
GGTCACGAAGTCTGTCTTCTCACGTACCACCACCTCTCAGGATGCCAGCCCTGGCACCTCACCTTGACAGGG  
AGAGACGGCCCCCGCGAGATTGGCCCAAAGATACACTAGGGGGTTTCTGCCCTCGGATAGTCTCTTAGGCGT  
TTCGTCTTTCAGAGTACTTTTCATTGTTTTAGAAACAGCTTCTTGAGTACCAGAGCCTACAGTTTTATGGGCAGAG  
TTTAGTTTCAACAGCAAATCATGAAAAATTACAATTTACATTTAGTTATACTCTAAGTCAACTCGCATGTCCTGTTA  
GAAGCAGGTTCCAGCCTTTTTAAAGAACAGTTTATCTTCTTTTAAACAAATGGAGGTATTACAAGGGACACAGA  
TGGAAGACAGGTTGCCACACCAAATAAATTAATGCAGTTTCCTTCTCCCAAAGGACATTCTCTTAAATGAAG  
GGTGGGAGAATGGGTAAATGTACAGAACTTTAGGTTGCTAGTTAGTCCCTTTACAGTCGAGAAGCACAGAGACT  
AGCCAGCCTTCTAATAATTGTTTTAAAAGTAGATGGCTTGAAAAGCCCTGGAGGCAGAATATTTAATTGCTTGCCT  
GCTAGTTCCTAAGAATTAATAATTAAGCAGTTCAGCATGAAATGGACTTGCAGTCTACCATGTAGGCTTTCTTTCA  
GTCTGGTGGAAGCTCTGGATGGTTACAGCCTGATTTATTGCTCTTATTGCTTACTCCCAGAACCAGACTTTGATG  
GGGAGGTAAGACAGACCCCCAATGGAGGTCACTTTAGGGTAGGGGCTGGAAGGCTGTGAGCAGAAAGCCAAG  
CCCATCCCTGTGGCTGGAACCTTCACATGGTGAGCACATAGCAACTTCTGATAAACAGGCAGTTCAGGCTTTCAGT  
CCCCTTCTGCCTTGGAACCTTTGACAACTTGAATGGGAAGAAGTCATCACATAAAATGCTGCATAATATTTCCA  
GAGCGGCATGACTGTGAAAAAATAACTGGCATTCTACACTCATAGACTTAGAGGACGAACTTTTGGTTGGTGGG  
GAGTGTGGCGGGGGGCATGGGGGAAGGGACAGGGAGTTTAGGATCGATGTGTATACACTGCTATATTTAAATG  
GATAACCAACAAAATCCTGCTGTATAACACAAGGAACGCTGCTAAGTGTGATGTGGCAGCCTGGATGGGAGGGG  
AGTTTGGGGGAGAATGGCTACATGTCTATGTATGGCTGAGTCCTTTGCTATCTACCTGAAACTGTCACAATATTG  
ATAATTTGCTATACCCCAAAAACAAAAGAAAAATTA AAAACTATATATATAACTGGCAATCTAAAAGCTAGCA  
TAGTCTCCTATTGCAGCAGGGGTAACCATGGCTATTAATTTATTGATCATTTTTTAAATTTTATCTGGTTTCCCTTG  
ACTGAAAGCAGTAGAAGTAAGATTTACATCGGAGAAAACATTCTTTAATAATAGAGAACTTCAGAGTAGAATT  
ATTTTTCTTAGTCTTGTGATACTCACTGATGAAAGGCAGGTGTGTTTCTTGAGCAAAAATCCTGCTACATATGTTG  
AAATGAGTAGAAAAACATATGATGAGCATGATGACTAGCCAGCATTTAATACTTGTTTAAAAGTGGACTGCCTTAA  
AAGCGCTGGAGGTGGACTATGTGATCATTTGCCATGCCCCAAAATGTTCCGTCGTGTGGTCTTGACAGGCCC  
TGAGTGATACGACATAGGAGGCCTTTGGTTTTTCATAACCTGCTCGTAGCAGAAGTAGGCAGACCGACTCGTTTC  
ACTGGCCTGGGCTCCTGAGATCTTTAGAATCACACCTGCCATCCCAGGACCCTATGCCTCAGAAAAATTTCAATTCC  
ATGCCTCTGTAAGCTAATATCTAATAAACTTCATGTATAAAATGATGTATATCGGGTATTACTGCAGCTGTTGACA  
CAGGTCTGTACTCATGGGGCTTTGCTGATTTACAGGACTGAGCTGTCTTCATTATTTAGTGGGCATTTTCATATA  
GGTCATGTGAAGGTTGTCAAGAAAGGCCTGAATGCTTTCACAGGAAGTGAATTTTGATAGATATGGATTACCT

CCCCTTACCCCCAGTCTTTTCTTTGGAAATAACTCCCATGATTCAGCCTCTCCAGAAGTATGAATGGGGCTAGTG  
TCTTTTCTCAGGGGAAACTGTCATTTGCTGACGTTTCCCAGAAGGAAATAGTGATGGACATACTGATAAGAAAG  
GAGGACAAGGGAGAAGCTGGAGAGTTTTGGGTGGAGTTGGGGGGTGATTTTGTGTTAGGGGGACATTTAACCACT  
TTTTTCTGTTTTGTAGTTTCATTTACTTATTTTGGCTGTGCTGGGTCTTTGTTGCTGTGCAAGCTCTTCGCTAGTTG  
CGGCGATTGGGGCTACGCTGGTTGCAGTGCACAGACTTCTGACTGCAGGAGGCTTCTCTTGCTGCAGAGCGCGG  
GCTCTTGGCCACGCAGGCTTCAGTAGCTGCGGCTCCCAGGCCCTAGAGCACAACTTAGTAGTTGTGGCCCACA  
GACTTGGTTGGTCTGTGTCATGTGGGATCTTCCTGGATCAGGGATTGAACCCATGTCTTCTGCACTGGCAGGCTG  
AT
